# Supplementary material for: Intron Derived Size Polymorphism in the Mitochondrial Genomes of Closely Related Chrysoporthe Species
Source: PubMed Central journal article supplement (PMC4894602; doi:10.1371/journal.pone.0156104), 2016-06-06

**S3 Fig. RPKM values for 14 genes.** This graph shows the average expression for genes are involved in oxidative phosphorylation and electron transport and the *rnpb* gene of *Chrysosporthe austroafricana* grown in complete and minimal media.

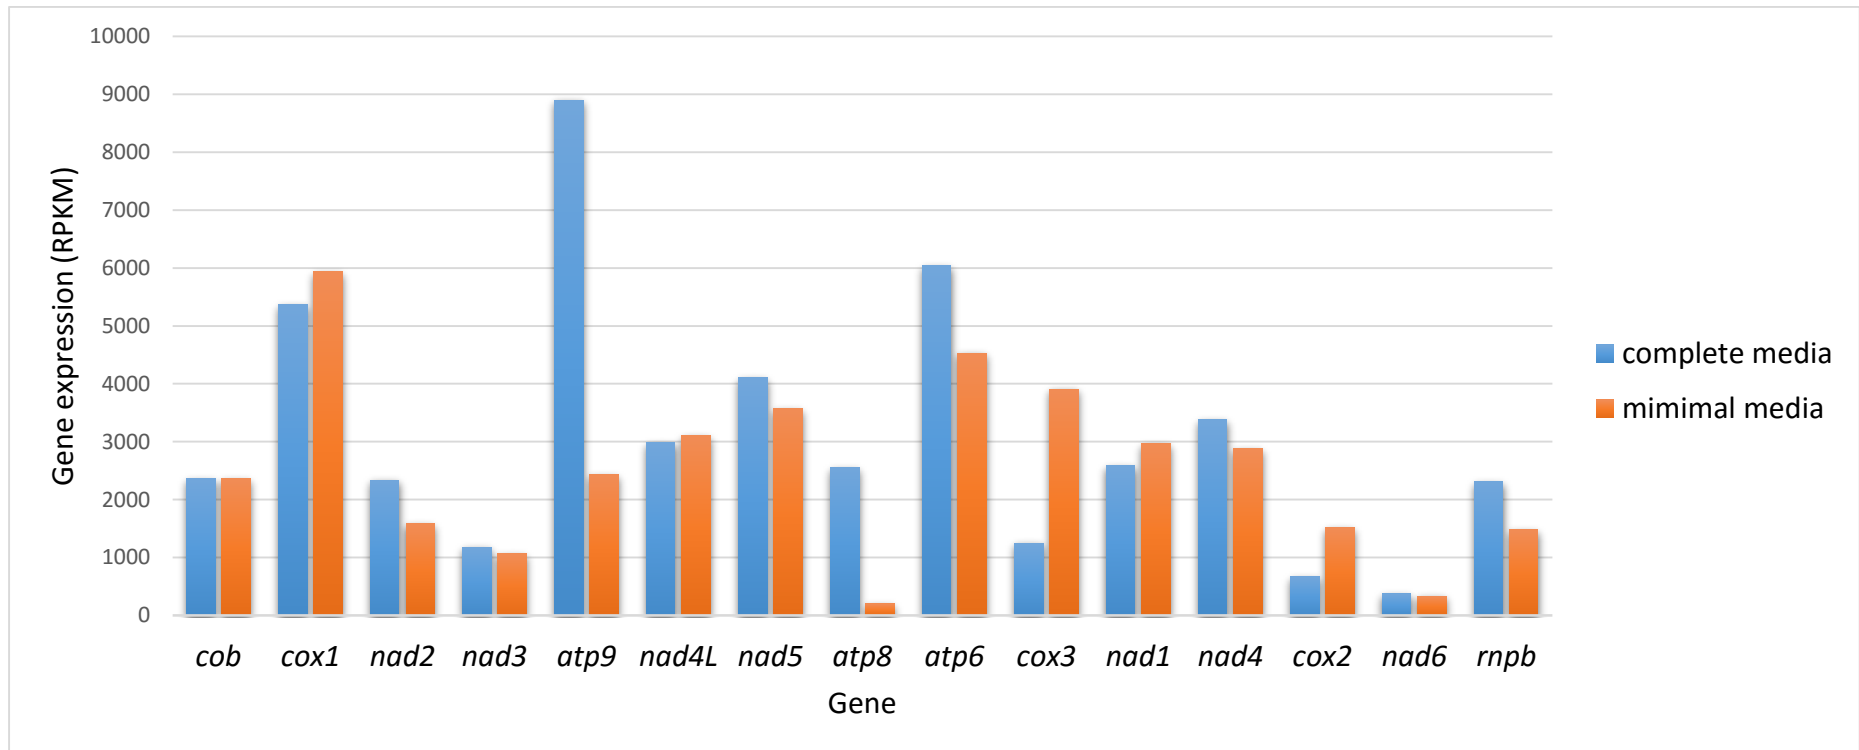

Supplement: pone.0156104.s003.pdf [file pone.0156104.s003.pdf]
