# Supplementary material for: Intron Derived Size Polymorphism in the Mitochondrial Genomes of Closely Related Chrysoporthe Species
Source: PubMed Central journal article supplement (PMC4894602; doi:10.1371/journal.pone.0156104), 2016-06-06

**S4 Fig. Physical maps of the mt genomes of *C. austroafricana*, *C. cubensis*, *C. deutero cubensis* and *C. parasitica* showing locations of all intronic and intergenic ORFs. Intronic ORFs are depicted by yellow arrowed boxes on introns of genes where found and are labelled according to the gene and intron position. Intergenic ORFs are also depicted by yellow arrowed boxes and are labelled with “IN” prefix.**

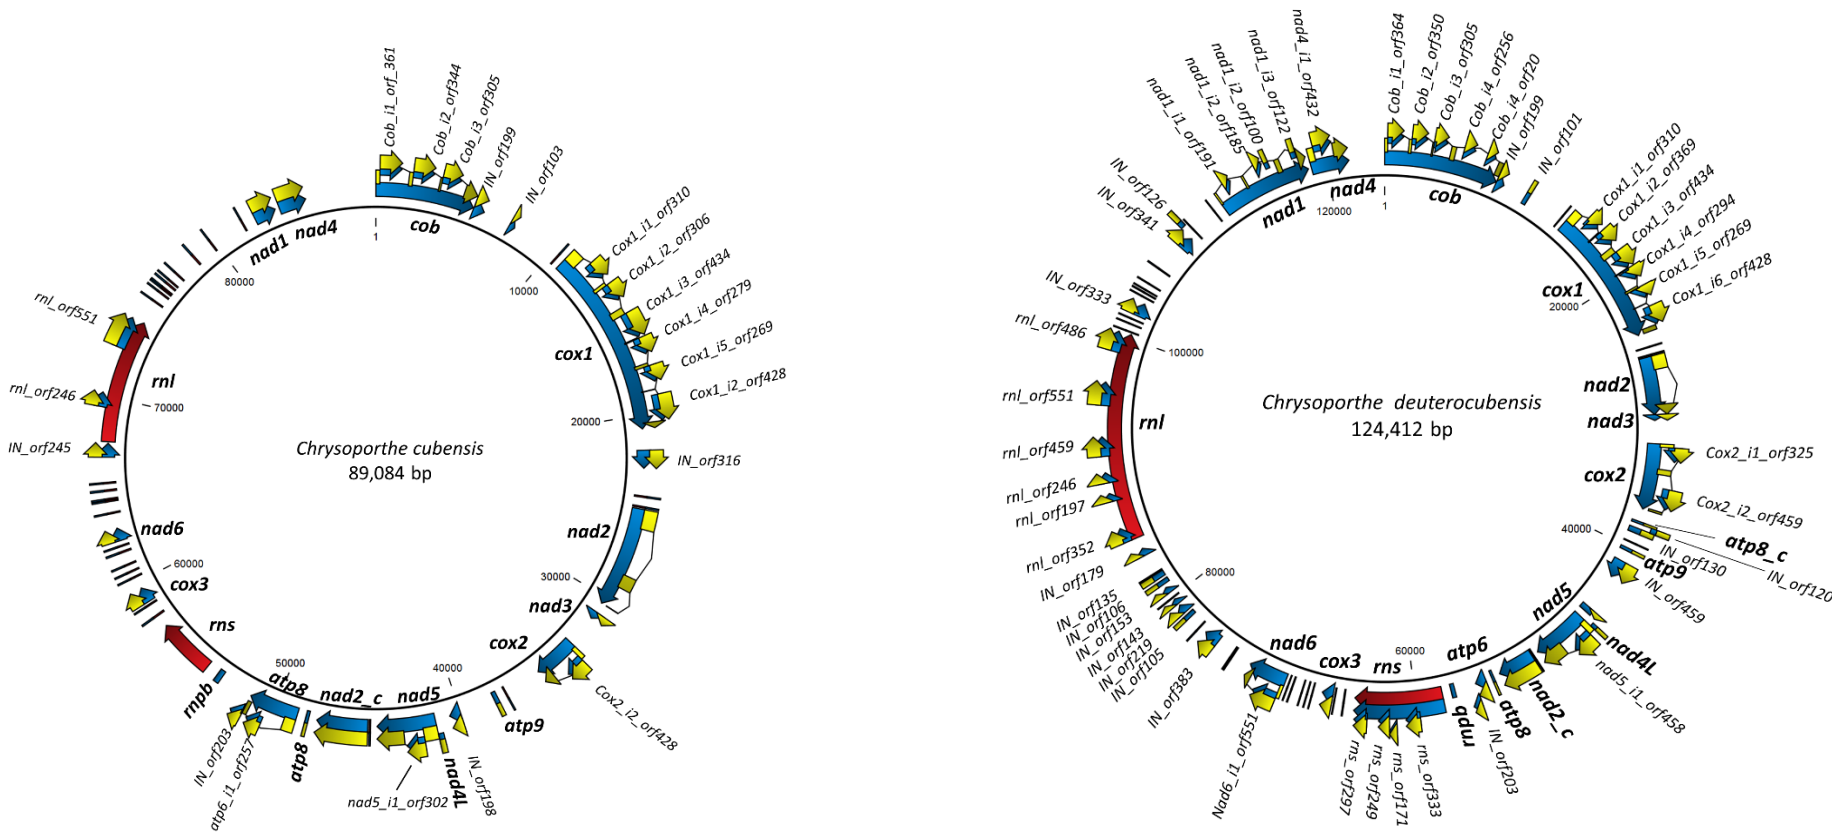

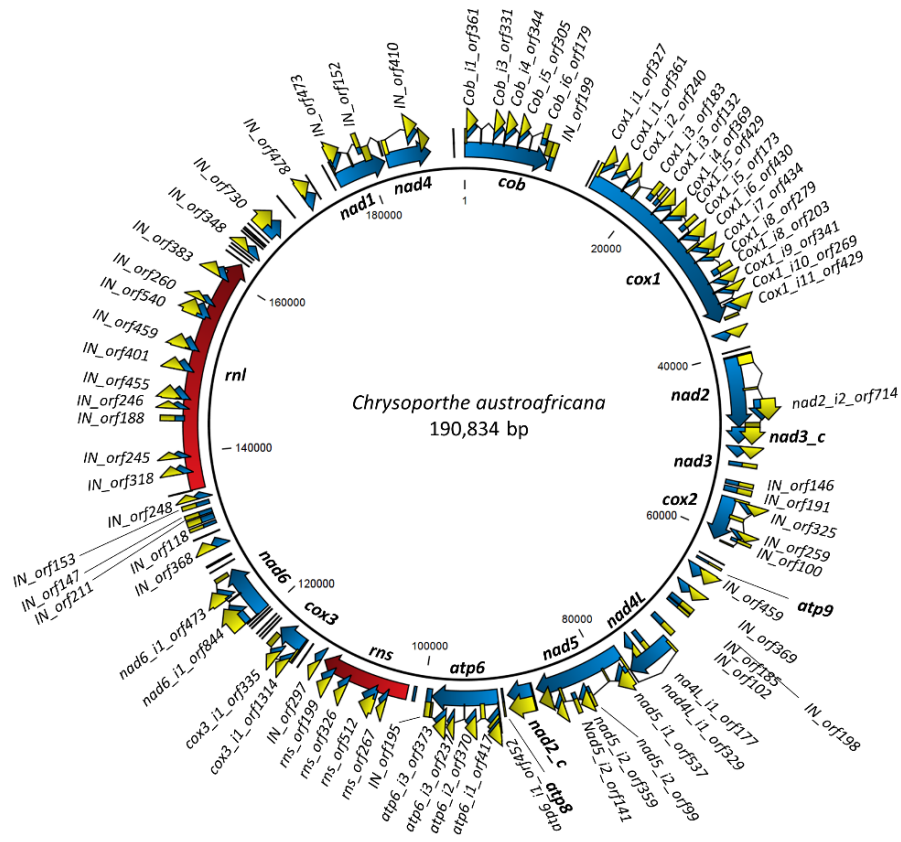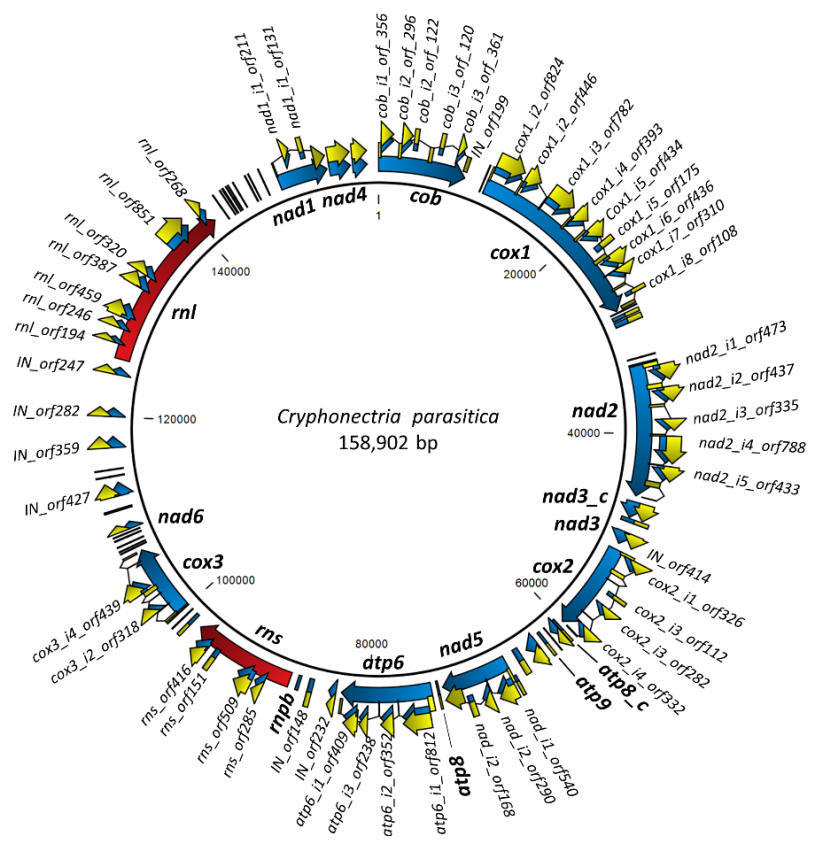

Supplement: pone.0156104.s004.pdf [file pone.0156104.s004.pdf]
