# Supplementary material for: Intron Derived Size Polymorphism in the Mitochondrial Genomes of Closely Related Chrysoporthe Species
Source: PubMed Central journal article supplement (PMC4894602; doi:10.1371/journal.pone.0156104), 2016-06-06
Supplement: pone.0156104.s005.pdf [file pone.0156104.s005.pdf]

**S1 Table. Accession number and species names for sequences used for *rps3* gene phylogeny.**

| Accession      | Protein sequence description and species name                                                  |
|----------------|------------------------------------------------------------------------------------------------|
| AAC24230.1     | S5 ribosomal protein/maturase fusion protein <i>Cryphonectria parasitica</i>                   |
| ACV41178.1     | ribosomal protein 3 <i>Sordaria fimicola</i>                                                   |
| YP 009126706.1 | mitochondrial ribosomal protein S5 <i>Neurospora crassa</i> OR74A                              |
| ACZ97559.1     | ribosomal protein 3 <i>Gelasinospora tetrasperma</i>                                           |
| YP 008964947.1 | ribosomal protein S3 <i>Annulohyphoxylon styum</i>                                             |
| YP 004769778.1 | ribosomal protein S3 <i>Chaetomium thermophilum</i> var. <i>thermophilum</i> DSM 1495          |
| XP 008100892.1 | ribosomal protein S3 <i>Colletotrichum graminicola</i> M1.001                                  |
| EXU94425.1     | small subunit ribosomal protein 3 <i>Metarhizium robertsii</i>                                 |
| YP 001249297.1 | small ribosomal protein 3 <i>Fusarium graminearum</i>                                          |
| YP 006576194.1 | ribosomal protein S3 <i>Madurella mycetomatis</i>                                              |
| YP 009154280.1 | ribosomal protein S3 <i>Pseudogymnoascus pannorum</i>                                          |
| AKK32420.1     | hypothetical protein <i>Trichoderma harzianum</i>                                              |
| ACV41160.1     | ribosomal protein 3/homing endonuclease-like fusion protein <i>Ophiostoma distortum</i>        |
| YP 009160634.1 | putative ribosomal protein S3 <i>Hirsutella minnesotensis</i>                                  |
| YP 009229331.1 | ribosomal protein S3 <i>Verticillium nonalfalfae</i>                                           |
| YP 009003975.1 | ribosomal protein S3 <i>Colletotrichum lindemuthianum</i>                                      |
| AAA31966.2     | ribosomal protein S5 putative <i>Neurospora crassa</i>                                         |
| ACV41151.1     | ribosomal protein 3/homing endonuclease-like fusion protein <i>Grosmannia europioides</i>      |
| ACV41164.1     | ribosomal protein 3/homing endonuclease-like fusion protein <i>Leptographium truncatum</i>     |
| ACV41155.1     | ribosomal protein 3/homing endonuclease-like fusion protein <i>Ceratocystiopsis brevicomis</i> |
| ACV41157.1     | ribosomal protein 3/homing endonuclease-like fusion protein <i>Graphilbum curvicolle</i>       |
| ACV41161.1     | ribosomal protein 3 <i>Graphilbum nigrum</i>                                                   |
| ACV41175.1     | ribosomal protein 3/homing endonuclease-like fusion protein <i>Ophiostoma minus</i>            |
| YP 001876496.1 | putative ribosomal protein S3 <i>Beauveria bassiana</i>                                        |
| YP 004733050.1 | ribosomal protein S3 <i>Phialocephala subalpina</i>                                            |
| ACZ97563.1     | ribosomal protein 3 <i>Sarcotrichila macrospora</i>                                            |
| NP 570148.1    | ribosomal protein S5 <i>Trichoderma reesei</i>                                                 |
| YP 008758054.1 | ribosomal protein S3 <i>Beauveria pseudobassiana</i>                                           |
| AKM22805.1     | hypothetical protein <i>Cordyceps militaris</i>                                                |
| YP 008815537.1 | ribosomal protein S3 <i>Pochonia chlamydosporia</i>                                            |
| YP 009072318.1 | ribosomal protein S3 <i>Sclerotinia borealis</i>                                               |
| YP 009122450.1 | ribosomal protein S3 <i>Sarocladium implicatum</i>                                             |
| XP 003009802.1 | ribosomal protein S3 <i>Verticillium alfalfae</i> VaMs.102                                     |
| YP 007507039.1 | ribosomal protein 3 <i>Ceratocystis cacaofunesta</i>                                           |
| YP 002213593.1 | ribosomal protein S3 <i>Cordyceps brongniartii</i>                                             |
| ACV41153.1     | ribosomal protein 3/homing endonuclease-like fusion protein <i>Ophiostoma ulmi</i>             |

|                |                                                                                                          |
|----------------|----------------------------------------------------------------------------------------------------------|
| AAV59060.1     | ribosomal protein 3/homing endonuclease-like protein fusion <i>Ophiostoma novo-ulmi subsp. americana</i> |
| AFD96021.1     | ribosomal protein S5 <i>Asperillus clavatus</i>                                                          |
| AKQ53309.1     | ribosomal protein S5 <i>Sclerotinia sclerotiorum</i> 1980 UF-70                                          |
| AKQ48052.1     | ribosomal protein S3 <i>Botrytis pseudocinerea</i>                                                       |
| AFD95940.1     | ribosomal protein S5 <i>Neosartorya fischeri</i>                                                         |
| NP 943722.1    | ribosomal protein S5 <i>Talaromyces marneffeii</i>                                                       |
| AGN74485.1     | ribosomal protein S3 <i>Glarea lozoyensis</i> 74030                                                      |
| AFD95916.1     | ribosomal protein S5 <i>Talaromyces stipitatus</i>                                                       |
| AKP95616.1     | ribosomal protein S3 <i>Penicillium nordicum</i>                                                         |
| AFD96000.1     | ribosomal protein S5 <i>Asperillus oryzae</i>                                                            |
| EIC07753.1     | ribosomal protein S3 <i>Microbacterium laevaniformans</i> OR221                                          |
| YP 008965401.1 | ribosomal protein S3 <i>Rhynchosporium orthosporum</i>                                                   |
| NP 775396.1    | putative ribosomal protein S3 <i>Lecanicillium muscarium</i>                                             |
| YP 008965320.1 | ribosomal protein S3 <i>Rhynchosporium agropyri</i>                                                      |
| YP 002970834.1 | ribosomal protein S5 <i>Arthroderma uncinatum</i>                                                        |
| YP 005351166.1 | ribosomal protein subunit 3 <i>Peltigera malacea</i>                                                     |
| YP 009107251.1 | ribosomal protein S5 <i>Asperillus ustus</i>                                                             |
| BAA02977.1     | S5 ribosomal protein <i>Penicillium chrysogenum</i>                                                      |
| YP 009154205.1 | ribosomal protein S3 <i>Penicillium roqueforti</i>                                                       |
| YP 002970806.1 | ribosomal protein S5 <i>Trichophyton mentagrophytes</i>                                                  |
| XP 002620075.1 | ribosomal protein S5 <i>Blastomyces lehrstii</i> SLH14081                                                |
| YP 002970890.1 | ribosomal protein S5 <i>Microsporum canis</i>                                                            |
| AIG55190.1     | ribosomal protein S3 <i>Paecilomyces hepiali</i>                                                         |
| YP 002970776.1 | ribosomal protein S5 <i>Trichophyton rubrum</i>                                                          |
| KMW03074.1     | ribosomal protein S5 <i>Microsporum gypseum</i> CBS 118893                                               |
| EER36345.1     | ribosomal protein S5 <i>Histoplasma capsulatum</i> H143                                                  |
| NP 074911.1    | ribosomal protein S3 <i>Podospora anserina</i>                                                           |
| YP 001427397.1 | ribosomal protein S5-like protein <i>Parastagonospora nodorum</i> SN15                                   |
| YP 002970862.1 | ribosomal protein S5 <i>Arthroderma obtusum</i>                                                          |
| YP 005351208.1 | ribosomal protein subunit 3 <i>Peltigera membranacea</i>                                                 |
| ACZ97561.1     | ribosomal protein 3 <i>Cornuvesica falcata</i>                                                           |
| ACZ97566.1     | ribosomal protein 3 <i>Sphaeronaemella fimicola</i>                                                      |
| EEH02514.1     | ribosomal protein S5 <i>Histoplasma capsulatum</i> G186AR                                                |
