# Supplementary material for: Intron Derived Size Polymorphism in the Mitochondrial Genomes of Closely Related Chrysoporthe Species
Source: PubMed Central journal article supplement (PMC4894602; doi:10.1371/journal.pone.0156104), 2016-06-06
Supplement: pone.0156104.s006.pdf [file pone.0156104.s006.pdf]

**S2 Table. Codon usage analysis.** Comparison of codon usage and tRNAs for the 14 genes involved in oxidative phosphorylation and electron transport in the mitochondrial genomes of *Chrysosporthe austroafricana*, *C. cubensis*, *C. deuterocubensis* and *Cryphonectria parasitica*.

| Amino acid | Codon | <i>C. austroafricana</i> |                      | <i>C. cubensis</i> |                      | <i>C. deuterocubensis</i> |                      | <i>C. parasitica</i> |                      |
|------------|-------|--------------------------|----------------------|--------------------|----------------------|---------------------------|----------------------|----------------------|----------------------|
|            |       | tRNA <sup>a</sup>        | % usage <sup>b</sup> | tRNA <sup>a</sup>  | % usage <sup>b</sup> | tRNA <sup>a</sup>         | % usage <sup>b</sup> | tRNA <sup>a</sup>    | % usage <sup>b</sup> |
| <b>Ala</b> | GCG   |                          | 0.57                 |                    | 0.47                 |                           | 0.53                 |                      | 0.58                 |
| <b>Ala</b> | GCA   | +                        | 1.93                 | +                  | 1.72                 | +                         | 1.89                 | +                    | 1.66                 |
| <b>Ala</b> | GCT   |                          | 3.22                 |                    | 3.26                 |                           | 3.31                 |                      | 3.39                 |
| <b>Ala</b> | GCC   |                          | 0.53                 |                    | 0.53                 |                           | 0.49                 |                      | 0.44                 |
| <b>Cys</b> | TGT   |                          | 0.76                 |                    | 0.64                 |                           | 0.56                 |                      | 0.51                 |
| <b>Cys</b> | TGC   | +                        | 0.19                 | +                  | 0.14                 | +                         | 0.11                 | +                    | 0.18                 |
| <b>Asp</b> | GAT   |                          | 2.44                 |                    | 2.30                 |                           | 2.16                 |                      | 2.30                 |
| <b>Asp</b> | GAC   | +                        | 0.55                 | +                  | 0.35                 | +                         | 0.27                 | +                    | 0.35                 |
| <b>Glu</b> | GAG   |                          | 0.96                 |                    | 0.68                 |                           | 0.73                 |                      | 0.73                 |
| <b>Glu</b> | GAA   | +                        | 2.12                 | +                  | 2.09                 | +                         | 1.93                 | +                    | 2.06                 |
| <b>Phe</b> | TTT   |                          | 5.84                 |                    | 6.09                 |                           | 6.11                 |                      | 5.96                 |
| <b>Phe</b> | TTC   | +                        | 2.25                 | +                  | 2.50                 | +                         | 2.51                 | +                    | 2.24                 |
| <b>Gly</b> | GGG   |                          | 1.04                 |                    | 0.98                 |                           | 0.87                 |                      | 0.73                 |
| <b>Gly</b> | GGA   | ++                       | 2.07                 | +                  | 2.09                 | +                         | 2.20                 | +                    | 1.82                 |
| <b>Gly</b> | GGT   |                          | 3.57                 |                    | 3.85                 |                           | 3.80                 |                      | 4.45                 |
| <b>Gly</b> | GGC   |                          | 0.14                 |                    | 0.12                 |                           | 0.11                 |                      | 0.27                 |
| <b>His</b> | CAT   |                          | 1.19                 |                    | 1.23                 |                           | 1.16                 |                      | 1.20                 |
| <b>His</b> | CAC   | +                        | 0.60                 | +                  | 0.64                 | +                         | 0.64                 | +                    | 0.60                 |
| <b>Ile</b> | ATA   |                          | 5.06                 |                    | 5.27                 |                           | 5.53                 | +                    | 5.05                 |
| <b>Ile</b> | ATT   |                          | 4.26                 |                    | 4.30                 |                           | 4.36                 |                      | 4.92                 |
| <b>Ile</b> | ATC   | +                        | 0.92                 | +                  | 1.15                 | +                         | 1.00                 | +                    | 0.97                 |
| <b>Lys</b> | AAG   |                          | 0.57                 |                    | 0.45                 |                           | 0.20                 |                      | 0.40                 |
| <b>Lys</b> | AAA   | +                        | 3.17                 | +                  | 2.34                 | ++                        | 2.07                 | +                    | 2.39                 |
| <b>Leu</b> | TTG   |                          | 1.33                 |                    | 1.23                 |                           | 1.22                 |                      | 1.35                 |
| <b>Leu</b> | TTA   | +                        | 9.36                 | +                  | 10.18                | +                         | 10.42                | +                    | 9.99                 |

|            |     |      |      |      |      |      |      |     |      |
|------------|-----|------|------|------|------|------|------|-----|------|
| <b>Leu</b> | CTG |      | 0.23 |      | 0.25 |      | 0.20 |     | 0.22 |
| <b>Leu</b> | CTA | +    | 1.06 | +    | 0.96 | +    | 1.11 | +   | 1.24 |
| <b>Leu</b> | CTT |      | 1.75 |      | 1.62 |      | 1.73 |     | 1.99 |
| <b>Leu</b> | CTC |      | 0.23 |      | 0.18 |      | 0.16 |     | 0.16 |
| <b>Met</b> | ATG | ++++ | 2.23 | ++++ | 2.46 | ++++ | 2.60 | +++ | 2.37 |
| <b>Asn</b> | AAT |      | 4.07 |      | 4.00 |      | 3.96 |     | 4.30 |
| <b>Asn</b> | AAC | +    | 0.92 | +    | 0.94 | +    | 0.89 | +   | 0.60 |
| <b>Pro</b> | CCG |      | 0.11 |      | 0.08 |      | 0.20 |     | 0.18 |
| <b>Pro</b> | CCA |      | 1.08 | +    | 1.05 |      | 0.98 | +   | 0.75 |
| <b>Pro</b> | CCT | +    | 2.03 |      | 2.19 | +    | 2.04 |     | 2.17 |
| <b>Pro</b> | CCC |      | 0.16 |      | 0.20 |      | 0.22 |     | 0.20 |
| <b>Gln</b> | CAG |      | 0.27 |      | 0.18 |      | 0.24 |     | 0.18 |
| <b>Gln</b> | CAA | +    | 1.84 | +    | 1.74 | +    | 1.71 | +   | 1.68 |
| <b>Arg</b> | AGG |      | 0.18 |      | 0.14 |      | 0.09 |     | 0.09 |
| <b>Arg</b> | AGA | ++   | 1.65 | ++   | 1.68 | +    | 1.64 | +   | 1.37 |
| <b>Arg</b> | CGG |      | 0.12 |      | 0.08 |      | 0.09 |     | 0.09 |
| <b>Arg</b> | CGA |      | 0.11 |      | 0.14 |      | 0.16 |     | 0.16 |
| <b>Arg</b> | CGT | +    | 0.41 | +    | 0.37 | +    | 0.24 | +   | 0.33 |
| <b>Arg</b> | CGC |      | 0.04 |      | 0.04 |      | 0.00 |     | 0.02 |
| <b>Ser</b> | AGT |      | 3.27 |      | 3.36 |      | 3.49 |     | 3.46 |
| <b>Ser</b> | AGC | +    | 0.46 | +    | 0.53 | +    | 0.51 | +   | 0.49 |
| <b>Ser</b> | TCG |      | 0.16 |      | 0.20 |      | 0.18 |     | 0.31 |
| <b>Ser</b> | TCA | +    | 2.02 | +    | 2.07 | +    | 1.98 | +   | 1.64 |
| <b>Ser</b> | TCT |      | 2.60 |      | 2.38 |      | 2.38 |     | 2.64 |
| <b>Ser</b> | TCC |      | 0.39 |      | 0.25 |      | 0.27 |     | 0.16 |
| <b>Thr</b> | ACG |      | 0.21 |      | 0.27 |      | 0.27 |     | 0.22 |
| <b>Thr</b> | ACA | +    | 2.02 | +    | 1.84 | +    | 1.91 | +   | 2.15 |
| <b>Thr</b> | ACT |      | 2.53 |      | 2.68 |      | 2.73 |     | 2.48 |
| <b>Thr</b> | ACC |      | 0.28 |      | 0.29 |      | 0.33 |     | 0.22 |
| <b>Val</b> | GTG |      | 0.60 |      | 0.66 |      | 0.64 |     | 0.84 |
| <b>Val</b> | GTA | +    | 2.94 | +    | 2.77 | +    | 2.91 | +   | 2.66 |

|            |     |   |      |   |      |   |      |   |      |
|------------|-----|---|------|---|------|---|------|---|------|
| <b>Val</b> | GTT |   | 3.04 |   | 3.24 |   | 3.22 |   | 3.23 |
| <b>Val</b> | GTC |   | 0.18 |   | 0.16 |   | 0.18 |   | 0.42 |
| <b>Trp</b> | TGG |   | 0.09 |   | 0.08 |   | 0.07 |   | 0.07 |
| <b>Trp</b> | TGA | + | 1.20 | + | 1.29 | + | 1.31 | + | 1.28 |
| <b>Tyr</b> | TAT |   | 3.54 |   | 3.55 |   | 3.62 |   | 3.59 |
| <b>Tyr</b> | TAC | + | 1.13 | + | 1.19 | + | 1.22 | + | 1.22 |
| <b>End</b> | TAG |   | 0.07 |   | 0.04 |   | 0.07 |   | 0.09 |
| <b>End</b> | TAA |   | 0.18 |   | 0.25 |   | 0.24 |   | 0.22 |

---

**a** tRNA gene for specified amino acid,

**b** Percentage codon usage calculated from the total number of codons of standard mt genes.

+ Presence and number of *tRNA* genes. The number of plus signs corresponds to the frequency of the respective *tRNA* gene.
