# Supplementary material for: Intron Derived Size Polymorphism in the Mitochondrial Genomes of Closely Related Chrysoporthe Species
Source: PubMed Central journal article supplement (PMC4894602; doi:10.1371/journal.pone.0156104), 2016-06-06
Supplement: pone.0156104.s007.pdf [file pone.0156104.s007.pdf]

**S3 Table. BLAST analysis of all identified introns against mt genome sequences deposited in NCBI GenBank.** The best hits for each query (intron) is shown. Default blast parameters were used. The prefix CA, CC, CD and CP is added to the intron names for clarity.

| <b>Intron (Query)</b> | <b>Top Accession</b> | <b>hit</b> | <b>Description</b>                                                                               | <b>E-value</b> | <b>% Identity</b> | <b>Query length</b> | <b>Alignment length</b> |
|-----------------------|----------------------|------------|--------------------------------------------------------------------------------------------------|----------------|-------------------|---------------------|-------------------------|
| CA_COBI1              | AB027350             |            | <i>Ophiocordyceps sobolifera</i> mitochondrial gene for small subunit ribosomal RNA              | 7.083E-31      | 72,05             | 1478                | 293                     |
| CA_COBI2              | HM149254             |            | <i>Monilinia fructigena</i> isolate ES41 cytochrome b (cytb) gene, complete cds                  | 0              | 90,52             | 1289                | 486                     |
| CA_COBI3              | FO906979             |            | <i>Leptosphaeria maculans</i> brassicae wa74_scaffold00107 complete sequence                     | 1.199E-21      | 93,51             | 1114                | 190                     |
| CA_COBI4              | JQ015302             |            | <i>Madurella mycetomatis</i> mitochondrion, complete genome                                      | 1.552E-140     | 86,81             | 1374                | 598                     |
| CA_COBI5              | KC683708             |            | <i>Neurospora crassa</i> OR74A mitochondrion, complete genome                                    | 0              | 84,34             | 1243                | 1169                    |
| CA_COBI6              | JN204426             |            | <i>Ustilaginoidea virens</i> isolate UV-8a Cytb protein (Cytb) gene, complete cds; mitochondrial | 0              | 86,49             | 1636                | 836                     |
| CA_COX1I1             | KT283062             |            | <i>Sclerotinia sclerotiorum</i> 1980 UF-70 mitochondrion, complete genome                        | 0              | 91,18             | 2924                | 903                     |
| CA_COX1I2             | JX985789             |            | <i>Tricholoma matsutake</i> mitochondrion, complete genome                                       | 2.058E-17      | 96,30             | 1160                | 142                     |
| CA_COX1I3             | JN007486             |            | <i>Chaetomium thermophilum</i> var. thermophilum strain DSM 1495 mitochondrion, complete genome  | 3.464E-141     | 89,47             | 2643                | 685                     |
| CA_COX1I4             | JQ354999             |            | <i>Aspergillus clavatus</i> strain NRRL 1 mitochondrion, partial genome                          | 3.239E-173     | 76,52             | 1275                | 882                     |
| CA_COX1I5             | KP137411             |            | <i>Diaporthe longicolla</i> mitochondrion, complete genome                                       | 0              | 88,37             | 2647                | 571                     |
| CA_COX1I6             | KR109212             |            | <i>Ganoderma applanatum</i> strain CGMCC5.249 mitochondrion, complete genome                     | 1.061E-128     | 78,38             | 1332                | 911                     |
| CA_COX1I7             | FO906979             |            | <i>Leptosphaeria maculans</i> brassicae wa74_scaffold00107 complete sequence                     | 0              | 84,75             | 1324                | 1327                    |
| CA_COX1I8             | KF545917             |            | <i>Annulohyphoxylon stygium</i> mitochondrion, complete genome                                   | 0              | 91,84             | 2664                | 1026                    |
| CA_COX1I9             | GU723273             |            | <i>Trametes cingulata</i> strain ATCC 26747 mitochondrion, complete genome                       | 0              | 85,89             | 1085                | 961                     |
| CA_COX1I10            | JN007486             |            | <i>Chaetomium thermophilum</i> var. thermophilum strain DSM 1495 mitochondrion, complete genome  | 0              | 90,74             | 1181                | 870                     |

|                       |                          |                                                                                     |                |                   |                     |                         |
|-----------------------|--------------------------|-------------------------------------------------------------------------------------|----------------|-------------------|---------------------|-------------------------|
| CA_COX1I11            | KT283062                 | <i>Sclerotinia sclerotiorum</i> 1980 UF-70 mitochondrion, complete genome           | 0              | 84,65             | 1576                | 1517                    |
| CA_NAD2I1             | KC993182                 | <i>Pichia kluyveri</i> strain CBS 7907 mitochondrion, complete genome               | 1.793E-41      | 80,49             | 2538                | 199                     |
| CA_NAD2I2             | KJ434027                 | <i>Sclerotinia borealis</i> strain F-4128 mitochondrion, complete genome            | 2.176E-116     | 96,77             | 3477                | 666                     |
| CA_COX2I1             | FO906979                 | <i>Leptosphaeria maculans</i> brassicae wa74_scaffold00107 complete sequence        | 0              | 90,00             | 1566                | 805                     |
| CA_COX2I2             | KJ434027                 | <i>Sclerotinia borealis</i> strain F-4128 mitochondrion, complete genome            | 0              | 90,91             | 2562                | 1674                    |
| CA_NAD4LI1            | JN088164                 | <i>Peltigera malacea</i> mitochondrion, complete genome                             | 0              | 82,54             | 4675                | 654                     |
| CA_NAD5I1             | AF456838                 | <i>Cryphonectria parasitica</i> isolate Ep 155 NADH                                 | 0              | 89,10             | 2118                | 2086                    |
| CA_NAD5I2             | FO906020                 | <i>Leptosphaeria maculans</i> lepidii ibcn84_scaffold00004 complete sequence        | 0              | 88,00             | 4828                | 1521                    |
| CA_NAD5I3             | KR952337                 | <i>Fusarium oxysporum</i> strain UASWS AC1 mitochondrion, complete genome           | 7.667E-100     | 84,16             | 1004                | 383                     |
| CA_ATP6I1             | HQ259115                 | <i>Moniliophthora roreri</i> mitochondrion, complete genome                         | 3.975E-78      | 70,21             | 1444                | 729                     |
| CA_ATP6I2             | KF545917                 | <i>Annulohypoxylon stygium</i> mitochondrion, complete genome                       | 0              | 100,00            | 1694                | 1134                    |
| CA_ATP6I1             | FO905844                 | <i>Leptosphaeria biglobosa</i> Thlaspii ibcn65_scaffold00057 complete sequence      | 0              | 100,00            | 3366                | 1030                    |
| CA_CO3I1              | NW_003533854             | <i>Leptosphaeria maculans</i>                                                       | 0              | 74,58             | 2303                | 1581                    |
| CA_NAD6I1             | KU050083                 | <i>Racomitrium lanuginosum</i> mitochondrion, complete genome                       | 7.031E-8       | 95,45             | 2835                | 44                      |
| CA_NAD6I2             | FO906979                 | <i>Leptosphaeria maculans</i>                                                       | 7.987E-96      | 90,24             | 2170                | 646                     |
| CA_NAD1I1             | KF545917                 | <i>Annulohypoxylon stygium</i> mitochondrion, complete genome                       | 0              | 85,28             | 1975                | 1770                    |
| CA_NAD1I2             | KF545917                 | <i>Annulohypoxylon stygium</i> mitochondrion, complete genome                       | 0              | 100,00            | 1406                | 1114                    |
| CA_NAD1I3             | KJ434027                 | <i>Sclerotinia borealis</i> strain F-4128 mitochondrion, complete genome            | 1.143E-26      | 73,95             | 1093                | 638                     |
| CA_NAD4I1             | KR952336                 | <i>Penicillium nordicum</i> strain UASWS BFE487 mitochondrion                       | 1.684E-176     | 74,29             | 3469                | 1011                    |
| <b>Intron (Query)</b> | <b>Top hit accession</b> | <b>Description</b>                                                                  | <b>E-value</b> | <b>% identity</b> | <b>Query length</b> | <b>Alignment length</b> |
| CD_COBI1              | AB027350                 | <i>Ophiocordyceps sobolifera</i> mitochondrial gene for small subunit ribosomal RNA | 4.498E-27      | 77.61             | 1487                | 294                     |

|                       |                      |                                                                                     |                |                   |                     |                         |
|-----------------------|----------------------|-------------------------------------------------------------------------------------|----------------|-------------------|---------------------|-------------------------|
| CD_COBI2              | HQ259115             | <i>Moniliophthora roreri</i> mitochondrion, complete genome                         | 0              | 88.82             | 1437                | 686                     |
| CD_COBI3              | KC683708             | <i>Neurospora crassa</i> OR74A mitochondrion, complete genome                       | 0              | 84.33             | 1243                | 1169                    |
| CD_COBI4              | HQ908793             | <i>Monilia yunnanensis</i> isolate YQG10-6c cytochrome b (cytb) gene                | 0              | 79.60             | 3069                | 1058                    |
| CD_COX1I1             | JN007486             | <i>Chaetomium thermophilum</i> var. <i>thermophilum</i> strain DSM 1495             | 0              | 89.47             | 1562                | 925                     |
| CD_COX1I2             | JQ354999             | <i>Aspergillus clavatus</i> strain NRRL 1 mitochondrion, partial genome             | 4.183E-173     | 76.51             | 1275                | 882                     |
| CD_COX1I3             | FO906979             | <i>Leptosphaeria maculans brassicae</i> wa74_scaffold00107 complete sequence        | 0              | 79.88             | 1324                | 1327                    |
| CD_COX1I4             | KF545917             | <i>Annulohypoxylon stygium</i> mitochondrion, complete genome                       | 0              | 92.85             | 1334                | 1026                    |
| CD_COX1I5             | JN007486             | <i>Chaetomium thermophilum</i> var. <i>thermophilum</i> strain DSM 1495             | 0              | 90.74             | 1180                | 870                     |
| CD_COX1I6             | KT283062             | <i>Sclerotinia sclerotiorum</i> 1980 UF-70 mitochondrion, complete genome           | 0              | 84.71             | 1576                | 1517                    |
| CD_NAD2I1             | KC993182             | <i>Pichia kluyveri</i> strain CBS 7907 mitochondrion, complete genome               | 8.784E-42      | 80.48             | 2500                | 199                     |
| CD_COX2I1             | FO906979             | <i>Leptosphaeria maculans brassicae</i> wa74_scaffold00107 complete sequence        | 0              | 90.00             | 1574                | 805                     |
| CD_COX2I2             | KJ434027             | <i>Sclerotinia borealis</i> strain F-4128 mitochondrion, complete genome            | 0              | 87.14             | 2540                | 1240                    |
| CD_NAD5I1             | FO906020             | <i>Leptosphaeria maculans</i>                                                       | 6.466E-147     | 83.56             | 2001                | 558                     |
| CD_NAD6I1             | FO906020             | <i>Leptosphaeria maculans</i>                                                       | 7.41E-45       | 92.68             | 2168                | 393                     |
| CD_NAD1I1             | KF545917             | <i>Annulohypoxylon stygium</i> mitochondrion, complete genome                       | 0              | 88.46             | 2034                | 719                     |
| CD_NAD1I2             | NW_003533854         | <i>Leptosphaeria maculans</i>                                                       | 0              | 93.75             | 2338                | 1258                    |
| CD_NAD1I3             | KC683708             | <i>Neurospora crassa</i> OR74A mitochondrion, complete genome                       | 0              | 91.83             | 1261                | 1044                    |
| CD_NAD4I1             | HQ259115             | <i>Moniliophthora roreri</i> mitochondrion, complete genome                         | 1.741E-65      | 79.73             | 1335                | 286                     |
| <b>Intron (Query)</b> | <b>Top Accession</b> | <b>hit Description</b>                                                              | <b>E-value</b> | <b>% identity</b> | <b>Query length</b> | <b>Alignment length</b> |
| CC_COBI1              | AB027350             | <i>Ophiocordyceps sobolifera</i> mitochondrial gene for small subunit ribosomal RNA | 7.08E-31       | 72.05             | 1478                | 293                     |
| CC_COBI12             | JQ015302             | <i>Madurella mycetomatis</i> mitochondrion, complete genome                         | 1.551E-140     | 86.80             | 1374                | 598                     |

|                       |                      |                                                                                                        |                |                   |                     |                         |
|-----------------------|----------------------|--------------------------------------------------------------------------------------------------------|----------------|-------------------|---------------------|-------------------------|
| CC_COBI3              | KC683708             | <i>Neurospora crassa</i> OR74A mitochondrion, complete genome                                          | 0              | 84.33             | 1243                | 1169                    |
| CC_COX1I1             | JN007486             | <i>Chaetomium thermophilum</i> var. <i>thermophilum</i> strain DSM 1495 mitochondrion, complete genome | 0              | 89.47             | 1562                | 925                     |
| CC_COX1I2             | KP137411             | <i>Diaporthe longicolla</i> mitochondrion, complete genome                                             | 0              | 88.39             | 1327                | 951                     |
| CC_COX1I3             | FO906979             | <i>Leptosphaeria maculans</i> brassicae                                                                | 0              | 84.74             | 1324                | 1327                    |
| CC_COX1I4             | KF545917             | <i>Annulohyphoxylon stygium</i> mitochondrion, complete genome                                         | 0              | 91.42             | 1285                | 1026                    |
| CC_COX1I5             | JN007486             | <i>Chaetomium thermophilum</i> var. <i>thermophilum</i> strain DSM 1495 mitochondrion, complete genome | 0              | 90.74             | 1181                | 870                     |
| CC_COX1I6             | KT283062             | <i>Sclerotinia sclerotiorum</i> 1980 UF-70 mitochondrion, complete genome                              | 0              | 84.58             | 1576                | 1517                    |
| CC_NAD2I1             | JX271275             | <i>Agaricus bisporus</i> var. <i>bisporus</i> H97 mitochondrion, complete genome                       | 8.616E-62      | 75.44             | 2524                | 781                     |
| CC_NAD2I2             | XM_003342324         | <i>Sordaria macrospora</i> k-hell hypothetical protein (SMAC_12650), mRNA                              | 4.744E-160     | 84.23             | 1152                | 571                     |
| CC_COX2I1             | FO906979             | <i>Leptosphaeria maculans</i> brassicae                                                                | 0              | 90.00             | 1566                | 805                     |
| CC_NAD5I1             | KR952337             | <i>Fusarium oxysporum</i> strain UASWS AC1 mitochondrion, complete genome                              | 2.464E-100     | 84.15             | 1004                | 383                     |
| CC_ATP6I1             | EU053989             | <i>Phaeosphaeria nodorum</i> SN15 mitochondrion, complete genome                                       | 0              | 100               | 1862                | 1075                    |
| <b>Intron (Query)</b> | <b>Top Accession</b> | <b>hit Description</b>                                                                                 | <b>E-value</b> | <b>% identity</b> | <b>Query length</b> | <b>alignment length</b> |
| CP_COBI1              | AB027350             | <i>Ophiocordyceps sobolifera</i> mitochondrial gene for small subunit ribosomal RNA                    | 3.953E-28      | 76.62             | 1590                | 360                     |
| CP_COBI12             | KC683708             | <i>Neurospora crassa</i> OR74A mitochondrion, complete genome                                          | 0              | 85.96             | 2510                | 749                     |
| CP_COBI3              | HQ908793             | <i>Monilia yunnanensis</i> isolate YQG10-6c cytochrome b (cytb) gene, complete cds; mitochondrial      | 0              | 80.84             | 3050                | 1058                    |
| CP_COX1I1             | JN007486             | <i>Chaetomium thermophilum</i> var. <i>thermophilum</i> strain DSM 1495 mitochondrion, complete genome | 0              | 94.11             | 2592                | 1871                    |
| CP_COX1I2             | FO905844             | <i>Leptosphaeria biglobosa</i>                                                                         | 0              | 79.17             | 2403                | 1473                    |
| CP_COX1I3             | KF673550             | <i>Ganoderma sinense</i> mitochondrion, complete genome                                                | 1.998E-53      | 97.36             | 2606                | 570                     |
| CP_COX1I4             | KF545917             | <i>Annulohyphoxylon stygium</i> mitochondrion, complete genome                                         | 0              | 83.14             | 1507                | 990                     |
| CP_COX1I5             | KP137411             | <i>Diaporthe longicolla</i> mitochondrion, complete genome                                             | 7.405E-173     | 91.37             | 2545                | 503                     |

|           |              |                                                                                                                                                                                                                                                                                                                                             |            |       |      |      |
|-----------|--------------|---------------------------------------------------------------------------------------------------------------------------------------------------------------------------------------------------------------------------------------------------------------------------------------------------------------------------------------------|------------|-------|------|------|
| CP_COX1I6 | FO906979     | <i>Leptosphaeria maculans brassicae</i>                                                                                                                                                                                                                                                                                                     | 0          | 79.12 | 1328 | 1333 |
| CP_COX1I7 | JN007486     | <i>Chaetomium thermophilum</i> var. <i>thermophilum</i> strain DSM 1495 mitochondrion, complete genome                                                                                                                                                                                                                                      | 6.942E-148 | 71.18 | 1342 | 1061 |
| CP_COX1I8 | XM_007720497 | <i>Bipolaris zeicola</i> 26-R-13 hypothetical protein partial mRNA                                                                                                                                                                                                                                                                          | 4.117E-62  | 78.31 | 1531 | 340  |
| CP_NAD2I1 | KC832409     | <i>Botryotinia fuckeliana</i> B05.10 mitochondrion, complete genome                                                                                                                                                                                                                                                                         | 0          | 83.65 | 1608 | 924  |
| CP_NAD2I2 | KF545917     | <i>Annulohyphoxylon stygium</i> mitochondrion, complete genome                                                                                                                                                                                                                                                                              | 0          | 96.77 | 1458 | 1258 |
| CP_NAD2I3 | JX271275     | <i>Agaricus bisporus</i> var. <i>bisporus</i> H97 mitochondrion, complete genome                                                                                                                                                                                                                                                            | 4.256E-110 | 80.76 | 2479 | 882  |
| CP_NAD2I4 | Z69899       | <i>P.comata</i> mitochondrial cox1 gene                                                                                                                                                                                                                                                                                                     | 6.339E-32  | 85.93 | 2577 | 470  |
| CP_NAD2I5 | KR011238     | <i>Fusarium graminearum</i> strain CBS 104.09 mitochondrion, complete genome                                                                                                                                                                                                                                                                | 0          | 81.63 | 1525 | 1278 |
| CP_NAD2I6 | XM_003342324 | <i>Sordaria macrospora</i> k-hell hypothetical protein (SMAC_12650), mRNA                                                                                                                                                                                                                                                                   | 1.927E-171 | 84.84 | 1113 | 574  |
| CP_COX2I1 | FO906979     | <i>Leptosphaeria maculans brassicae</i>                                                                                                                                                                                                                                                                                                     | 4.632E-179 | 92.00 | 1541 | 805  |
| CP_COX2I2 | KJ434027     | <i>Sclerotinia borealis</i> strain F-4128 mitochondrion, complete genome                                                                                                                                                                                                                                                                    | 1.52E-96   | 89.18 | 624  | 356  |
| CP_COX2I3 | KJ434027     | <i>Sclerotinia borealis</i> strain F-4128 mitochondrion, complete genome                                                                                                                                                                                                                                                                    | 0          | 87.35 | 3748 | 1032 |
| CP_COX2I4 | KC832409     | <i>Botryotinia fuckeliana</i> B05.10 mitochondrion, complete genome                                                                                                                                                                                                                                                                         | 0          | 87.93 | 1908 | 1051 |
| CP_NAD5I1 | AF456838     | <i>Cryphonectria parasitica</i> isolate Ep 155 NADH-ubiquinone oxireductase subunit 4 (ND4) gene, complete cds; NADH-ubiquinone oxireductase subunit 5, ND5 intron 1 protein and ND5 intron 2 protein (ND5) gene, complete cds; ATPase 8 gene, complete cds; and ATPase 6 gene, partial cds; mitochondrial genes for mitochondrial products | 0          | 99.90 | 2091 | 2093 |
| CP_NAD5I2 | AF456838     | <i>Cryphonectria parasitica</i> isolate Ep 155 NADH-ubiquinone oxireductase subunit 4 (ND4) gene, complete cds; NADH-ubiquinone oxireductase subunit 5, ND5 intron 1 protein and ND5 intron 2 protein (ND5) gene, complete cds; ATPase 8 gene, complete cds; and ATPase 6 gene, partial cds; mitochondrial genes for mitochondrial products | 0          | 100   | 2400 | 2400 |

|           |          |                                                                                                                                                                                                                  |            |       |      |      |
|-----------|----------|------------------------------------------------------------------------------------------------------------------------------------------------------------------------------------------------------------------|------------|-------|------|------|
| CP_ATP6I1 | AF218567 | <i>Cryphonectria parasitica</i> putative maturase (maturase) gene, complete cds; mitochondrial gene for mitochondrial product                                                                                    | 0          | 99.78 | 2735 | 2366 |
| CP_ATP6I2 | KF545917 | <i>Annulohyphoxylon stygium</i> mitochondrion, complete genome                                                                                                                                                   | 0          | 78.13 | 1710 | 1135 |
| CP_ATP6I3 | FO905844 | <i>Leptosphaeria biglobosa</i> Thlaspii ibcn65_scaffold00057 complete sequence                                                                                                                                   | 0          | 93.93 | 3362 | 1030 |
| CP_COX3I1 | AF456845 | <i>Cryphonectria parasitica</i> isolate I-12b NADH-ubiquinone oxireductase subunit 5, ND5 group II intron protein and ND5 intron 2 protein (ND5) gene, partial cds; mitochondrial gene for mitochondrial product | 1.513E-23  | 84.68 | 942  | 148  |
| CP_COX3I2 | KF545917 | <i>Annulohyphoxylon stygium</i> mitochondrion, complete genome                                                                                                                                                   | 1.715E-149 | 78.64 | 1178 | 917  |
| CP_COX3I3 | JX185564 | <i>Ceratocystis cacaofunesta</i> mitochondrion, complete genome                                                                                                                                                  | 8.373E-8   | 88.57 | 492  | 98   |
| CP_COX3I4 | JN041209 | <i>Fusarium solani</i> mitochondrion, complete genome                                                                                                                                                            | 0          | 85.36 | 2577 | 1140 |
| CP_COX3I5 | KT283062 | <i>Sclerotinia sclerotiorum</i> 1980 UF-70 mitochondrion, complete genome                                                                                                                                        | 2.106E-97  | 93.33 | 724  | 374  |
| CP_NAD1I1 | KJ434027 | <i>Sclerotinia borealis</i> strain F-4128 mitochondrion, complete genome                                                                                                                                         | 0          | 79.72 | 3577 | 1427 |
