# Supplementary material for: Intron Derived Size Polymorphism in the Mitochondrial Genomes of Closely Related Chrysoporthe Species
Source: PubMed Central journal article supplement (PMC4894602; doi:10.1371/journal.pone.0156104), 2016-06-06
Supplement: pone.0156104.s008.pdf [file pone.0156104.s008.pdf]

**S4 Table. BLAST analysis of identified intron encoded and free standing HEG protein sequences.** Results from all possible comparisons were calculated.

Only Blast hits with a threshold of over 50% alignment coverage, 50% sequence identity and E-value of 0.00005 are shown.

| Query ( <i>C. cubensis</i> HEG)         | % identity | Alignment length | E-value      | Best hit ( <i>C. austroafricana</i> HEGs) | Query (HEG) length |
|-----------------------------------------|------------|------------------|--------------|-------------------------------------------|--------------------|
| cc_IN_orf203                            | 100.00     | 195              | 4.05612e-143 | ca_IN_orf195                              | 203                |
| cc_cob_i1_orf361                        | 100.00     | 360              | 0            | ca_cob_i1_orf361                          | 360                |
| cc_cob_i2_orf344                        | 100.00     | 344              | 0            | ca_cob_i4_orf344                          | 344                |
| cc_cob_i3_orf305                        | 100.00     | 305              | 0            | ca_cob_i5_orf305                          | 305                |
| cc_IN_orf199                            | 100.00     | 199              | 2.74836e-147 | ca_IN_orf199                              | 199                |
| cc_cox1_i1_orf310                       | 99.24      | 132              | 6.1544e-090  | ca_cox1_i3_orf132                         | 310                |
| cc_cox1_i3_orf434                       | 100.00     | 434              | 0            | ca_cox1_i7_orf434                         | 434                |
| cc_cox1_i2_orf306                       | 100.00     | 173              | 9.8248e-126  | ca_cox1_i5_orf173                         | 306                |
| cc_cox1_i4_orf279                       | 100.00     | 279              | 0            | ca_cox1_i8_orf279                         | 279                |
| cc_cox1_i5_orf269                       | 100.00     | 269              | 0            | ca_cox1_i10_orf269                        | 269                |
| cc_cox1_i6_orf428                       | 99.30      | 428              | 0            | ca_cox1_i11_orf428                        | 428                |
| cc_IN_orf316                            | 98.41      | 314              | 0            | ca_IN_orf362                              | 316                |
| cc_IN_orf325                            | 99.69      | 325              | 0            | ca_cox2_i1_orf325                         | 325                |
| cc_IN_orf198                            | 100.00     | 198              | 2.61646e-139 | ca_IN_orf198                              | 198                |
| cc_nad5_i1_orf302                       | 100.00     | 302              | 0            | ca_nad5_i13_orf302                        | 302                |
| cc_atp6_i1_orf257                       | 99.12      | 228              | 5.04123e-170 | ca_atp6_i3_orf237                         | 257                |
| cc_IN_orf203                            | 99.62      | 264              | 0            | ca_atp6_i1_orf452                         | 264                |
| cc_IN_orf203                            | 100.00     | 195              | 4.05612e-143 | ca_IN_orf195                              | 203                |
| cc_IN_orf245                            | 99.59      | 245              | 2.64309e-179 | ca_rnl_orf245                             | 245                |
| cc_rnl_orf246                           | 99.59      | 246              | 0            | ca_rnl_orf246                             | 246                |
| cc_rnl_orf551                           | 99.06      | 533              | 0            | ca_rnl_orf540                             | 551                |
| Query ( <i>C. deuterocubensis</i> HEGs) | % identity | Alignment length | E-value      | Best hit ( <i>C. austroafricana</i> HEGs) | Query (HEG) length |
| cd_cob_i1_orf364                        | 95.59      | 363              | 0            | ca_cob_i1_orf361                          | 363                |
| cd_cob_i2_orf350                        | 81.95      | 349              | 0            | ca_cob_i4_orf344                          | 350                |
| cd_cob_i3_orf305                        | 99.02      | 305              | 0            | ca_cob_i5_orf305                          | 305                |

|                   |        |     |              |                    |     |
|-------------------|--------|-----|--------------|--------------------|-----|
| cd_IN_orf199      | 97.49  | 199 | 5.54481e-142 | ca_IN_orf199       | 199 |
| cd_cox1_i1_orf310 | 99.24  | 132 | 5.46179e-090 | ca_cox1_i3_orf132  | 310 |
| cd_cox1_i2_orf369 | 99.73  | 369 | 0            | ca_cox1_i4_orf369  | 369 |
| cd_cox1_i3_orf434 | 97.93  | 434 | 0            | ca_cox1_i7_orf434  | 434 |
| cd_cox1_i4_orf294 | 92.52  | 294 | 0            | ca_cox1_i8_orf279  | 294 |
| cd_cox1_i5_orf269 | 99.26  | 269 | 0            | ca_cox1_i10_orf269 | 269 |
| cd_cox1_i6_orf428 | 97.66  | 428 | 0            | ca_cox1_i11_orf428 | 428 |
| cd_cox2_i1_orf325 | 97.85  | 325 | 0            | ca_cox2_i1_orf325  | 325 |
| cd_cox2_i2_orf459 | 92.25  | 258 | 6.23259e-179 | ca_cox2_i2_orf259  | 459 |
| cd_IN_orf459      | 97.82  | 459 | 0            | ca_IN_orf459       | 459 |
| cd_IN_orf137      | 97.73  | 44  | 5.30154e-025 | ca_IN_orf198       | 137 |
| cd_nad5_i1_orf486 | 90.00  | 70  | 5.59979e-038 | ca_nad5_i2_orf99   | 486 |
| cd_IN_orf203      | 99.24  | 264 | 0            | ca_atp6_i1_orf452  | 264 |
| cd_rns_orf333     | 75.62  | 320 | 5.72715e-179 | ca_rns_orf326      | 333 |
| cd_rns_orf171     | 92.13  | 127 | 2.59967e-082 | ca_rns_orf373      | 171 |
| cd_rns_orf249     | 92.13  | 127 | 2.59967e-082 | ca_rns_orf373      | 171 |
| cd_rns_orf297     | 100.00 | 297 | 0            | ca_IN_orf297       | 297 |
| cd_nad6_i1_orf551 | 97.67  | 473 | 0            | ca_nad6_i2_orf473  | 551 |
| cd_IN_orf383      | 98.36  | 365 | 0            | ca_IN_orf368       | 383 |
| cd_IN_orf105      | 62.39  | 109 | 4.3586e-040  | ca_IN_orf118       | 105 |
| cd_IN_orf219      | 63.59  | 206 | 8.44336e-091 | ca_IN_orf211       | 219 |
| cd_IN_orf143      | 61.81  | 144 | 1.33168e-042 | ca_IN_orf147       | 143 |
| cd_IN_orf153      | 80.39  | 153 | 4.1264e-089  | ca_IN_orf153       | 153 |
| cd_IN_orf106      | 72.04  | 93  | 3.58606e-044 | ca_IN_orf248       | 106 |
| cd_IN_orf179      | 93.30  | 179 | 1.58984e-117 | ca_rnl_orf245      | 179 |
| cd_rnl_orf197     | 83.42  | 187 | 4.84359e-116 | ca_rnl_orf188      | 197 |
| cd_rnl_orf246     | 98.37  | 246 | 1.70586e-179 | ca_rnl_orf246      | 246 |
| cd_rnl_orf459     | 98.69  | 459 | 0            | ca_rnl_orf459      | 459 |
| cd_rnl_orf551     | 96.81  | 533 | 0            | ca_rnl_orf540      | 551 |

|                                        |                   |                         |                |                                            |                           |
|----------------------------------------|-------------------|-------------------------|----------------|--------------------------------------------|---------------------------|
| cd_IN_orf333                           | 95.50             | 333                     | 0              | ca_IN_orf348                               | 333                       |
| cd_IN_orf341                           | 97.64             | 339                     | 0              | ca_IN_orf478                               | 341                       |
| cd_IN_orf126                           | 97.64             | 339                     | 0              | ca_IN_orf478                               | 341                       |
| cd_nad1_i1_orf191                      | 95.98             | 174                     | 2.44444e-116   | ca_nad1_i1_orf473                          | 191                       |
| cd_nad1_i2_orf185                      | 100.00            | 30                      | 1.785e-018     | ca_nad1_i2_orf152                          | 185                       |
| cd_nad1_i2_orf100                      | 57.78             | 90                      | 2.12297e-028   | ca_IN_orf369                               | 100                       |
| cd_nad1_i3_orf122                      | 34.78             | 115                     | 2.94946e-012   | ca_cox2_i1_orf325                          | 122                       |
| cd_nad4_i1_orf432                      | 99.02             | 410                     | 0              | ca_nad4_i1_orf410                          | 432                       |
| <b>Query id (<i>C. parasitica</i>)</b> | <b>% Identity</b> | <b>Alignment length</b> | <b>E-value</b> | <b>Best hit (<i>C. austroafricana</i>)</b> | <b>Query (HEG) length</b> |
| cp_IN_orf160                           | 50.00             | 16                      | 0.756835       | ca_nad4L_i1_orf177                         | 160                       |
| cp_nad1_i1                             | 59.38             | 128                     | 8.814e-049     | ca_nad1_i1_orf473                          | 131                       |
| cp_rns_orf509                          | 67.11             | 450                     | 0              | ca_rns_orf512                              | 509                       |
| cp_IN_orf179                           | 69.30             | 114                     | 2.76115e-050   | ca_IN_orf185                               | 179                       |
| cp_rns_orf151                          | 78.63             | 117                     | 6.32947e-064   | ca_rns_orf326                              | 151                       |
| cp_cob_i2_orf296                       | 79.32             | 295                     | 8.09228e-174   | ca_cob_i5_orf305                           | 296                       |
| cp_cox1_i5_orf434                      | 79.45             | 438                     | 0              | ca_cox1_i5_orf429                          | 434                       |
| cp_rnl_orf194                          | 82.22             | 180                     | 7.7753e-107    | ca_rnl_orf188                              | 194                       |
| cp_rnl_orf387                          | 82.66             | 346                     | 0              | ca_rnl_orf401                              | 387                       |
| cp_cob_i1_orf356                       | 83.71             | 356                     | 0              | ca_cob_i1_orf361                           | 356                       |
| cp_cox1_i7_orf310                      | 84.24             | 203                     | 3.68425e-123   | ca_cox1_i8_orf203                          | 310                       |
| cp_cox1_i5_orf173                      | 86.71             | 173                     | 4.22695e-113   | ca_cox1_i5_orf173                          | 173                       |
| cp_IN_orf106                           | 87.38             | 103                     | 4.75303e-049   | ca_IN_orf297                               | 106                       |
| cp_rnl_orf851                          | 87.74             | 530                     | 0              | ca_rnl_orf540                              | 851                       |
| cp_nad5_i1_orf540                      | 87.76             | 539                     | 0              | ca_nad5_i1_orf537                          | 540                       |
| cp_cox2_i1_orf326                      | 88.65             | 326                     | 0              | ca_cox2_i1_orf325                          | 326                       |
| cp_atp6_i3_orf238                      | 88.66             | 238                     | 6.46194e-156   | ca_atp6_i3_orf237                          | 238                       |
| cp_rnl_orf246                          | 88.76             | 249                     | 1.29421e-160   | ca_rnl_orf246                              | 246                       |
| cp_atp6_i3_orf409                      | 89.24             | 409                     | 0              | ca_atp6_i3_orf409                          | 409                       |

|                                   |                   |                         |                |                                             |                           |
|-----------------------------------|-------------------|-------------------------|----------------|---------------------------------------------|---------------------------|
| cp_cox3_i2_orf318                 | 89.81             | 314                     | 0              | ca_cox3_i1_orf314                           | 318                       |
| cp_cox1_i6_orf436                 | 90.14             | 436                     | 0              | ca_cox1_i7_orf434                           | 436                       |
| cp_IN_orf427                      | 91.72             | 326                     | 0              | ca_IN_orf368                                | 427                       |
| cp_rns_orf28                      | 92.51             | 267                     | 0              | ca_rns_orf267                               | 285                       |
| cp_IN_orf414                      | 93.97             | 365                     | 0              | ca_IN_orf369                                | 414                       |
| cp_cox2_i3_orf112                 | 94.20             | 69                      | 2.86625e-042   | ca_cox2_i2_orf259                           | 112                       |
| cp_rns_orf416                     | 94.37             | 373                     | 0              | ca_rns_orf373                               | 416                       |
| cp_atp6_i2_orf365                 | 94.54             | 366                     | 0              | ca_atp6_i2_orf370                           | 365                       |
| cp_IN_orf414                      | 95.29             | 191                     | 2.55418e-136   | ca_IN_orf191                                | 414                       |
| cp_rnl_orf459                     | 96.17             | 444                     | 0              | ca_rnl_orf455                               | 459                       |
| <b>Query (<i>C. cubensis</i>)</b> | <b>% Identity</b> | <b>Alignment length</b> | <b>E-value</b> | <b>Best hit (<i>C. deuterocubensis</i>)</b> | <b>Query (HEG) length</b> |
| cc_IN_orf203                      | 95.07             | 203                     | 2.3964e-142    | cd_IN_orf203                                | 203                       |
| cc_cob_i1_orf361                  | 95.59             | 363                     | 0              | cd_cob_i1_orf364                            | 360                       |
| cc_cob_i2_orf344                  | 81.95             | 349                     | 0              | cd_cob_i2_orf350                            | 344                       |
| cc_cob_i3_orf305                  | 99.02             | 305                     | 0              | cd_cob_i3_orf305                            | 305                       |
| cc_IN_orf199                      | 97.49             | 199                     | 3.13106e-142   | cd_IN_orf199                                | 199                       |
| cc_IN_orf103                      | 89.74             | 78                      | 4.02419e-047   | cd_IN_orf101                                | 103                       |
| cc_cox1_i1_orf310                 | 99.35             | 310                     | 0              | cd_cox1_i1_orf310                           | 310                       |
| cc_cox1_i3_orf434                 | 97.93             | 434                     | 0              | cd_cox1_i3_orf434                           | 434                       |
| cc_cox1_i4_orf279                 | 92.52             | 294                     | 0              | cd_cox1_i4_orf294                           | 279                       |
| cc_cox1_i5_orf269                 | 99.26             | 269                     | 0              | cd_cox1_i5_orf269                           | 269                       |
| cc_cox1_i6_orf428                 | 97.43             | 428                     | 0              | cd_cox1_i6_orf428                           | 428                       |
| cc_IN_orf325                      | 98.15             | 325                     | 0              | cd_cox2_i1_orf325                           | 325                       |
| cc_IN_orf198                      | 97.73             | 44                      | 1.74817e-024   | cd_IN_orf137                                | 198                       |
| cc_IN_orf203                      | 99.62             | 264                     | 0              | cd_IN_orf203                                | 264                       |
| cc_IN_orf203                      | 95.07             | 203                     | 2.3964e-142    | cd_IN_orf203                                | 203                       |
| cc_IN_orf245                      | 93.30             | 179                     | 1.80015e-117   | cd_IN_orf179                                | 245                       |
| cc_rnl_orf246                     | 98.78             | 246                     | 0              | cd_rnl_orf246                               | 246                       |

|                                     |                   |                         |                |                                        |                           |
|-------------------------------------|-------------------|-------------------------|----------------|----------------------------------------|---------------------------|
| cc_rnl_orf551                       | 97.82             | 550                     | 0              | cd_rnl_orf551                          | 551                       |
| <b>Query (<i>C. cubensis</i>)</b>   | <b>% Identity</b> | <b>Alignment length</b> | <b>E-value</b> | <b>Best hit (<i>C. parasitica</i>)</b> | <b>Query (HEG) length</b> |
| cc_cob_i3_orf305                    | 79.32             | 295                     | 6.52743e-174   | cp_cob_i2_orf296                       | 305                       |
| cc_cob_i1_orf361                    | 84.36             | 358                     | 0              | cp_cob_i1_orf356                       | 360                       |
| cc_cox1_i2_orf306                   | 86.71             | 173                     | 2.10816e-111   | cp_cox1_i5_orf173                      | 306                       |
| cc_rnl_orf551                       | 88.15             | 523                     | 0              | cp_rnl_orf851                          | 551                       |
| cc_IN_orf325                        | 88.96             | 326                     | 0              | cp_cox2_i1_orf326                      | 325                       |
| cc_rnl_orf246                       | 89.16             | 249                     | 1.05408e-161   | cp_rnl_orf246                          | 246                       |
| cc_atp6_i1_orf257                   | 89.47             | 228                     | 5.83895e-152   | cp_atp6_i3_orf238                      | 257                       |
| cc_cox1_i3_orf434                   | 90.14             | 436                     | 0              | cp_cox1_i6_orf436                      | 434                       |
| <b>Query (<i>C. parasitica</i>)</b> | <b>% Identity</b> | <b>Alignment length</b> | <b>E-value</b> | <b>Best hit (<i>C. parasitica</i>)</b> | <b>Query (HEG) length</b> |
| cd_nad1_i1_orf191                   | 59.38             | 128                     | 3.23038e-051   | cp_nad1_i1_orf131                      | 191                       |
| cd_cob_i3_orf305                    | 80.00             | 295                     | 2.90036e-175   | cp_cob_i2_orf296                       | 305                       |
| cd_cob_i1_orf364                    | 83.84             | 359                     | 0              | cp_cob_i1_orf356                       | 363                       |
| cd_cob_i4_orf256                    | 86.21             | 116                     | 2.18369e-066   | cp_cob_i3_orf120                       | 256                       |
| cd_rns_orf297                       | 86.54             | 104                     | 1.63116e-048   | cp_IN_orf106                           | 297                       |
| cd_IN_orf383                        | 87.82             | 353                     | 0              | cp_IN_orf427                           | 383                       |
| cd_rnl_orf246                       | 87.95             | 249                     | 7.8247e-160    | cp_rnl_orf246                          | 246                       |
| cd_rnl_orf551                       | 88.34             | 523                     | 0              | cp_rnl_orf851                          | 551                       |
| cd_cox2_i1_orf325                   | 88.65             | 326                     | 0              | cp_cox2_i1_orf326                      | 325                       |
| cd_rnl_orf352                       | 89.07             | 247                     | 2.85466e-163   | cp_IN_orf247                           | 352                       |
| cd_cox1_i3_orf434                   | 90.83             | 436                     | 0              | cp_cox1_i6_orf436                      | 434                       |
| cd_cob_i4_orf202                    | 94.00             | 200                     | 6.69243e-136   | cp_cob_i3_orf201                       | 202                       |
| cd_cox2_i2_orf459                   | 95.10             | 102                     | 5.76496e-063   | cp_cox2_i3_orf112                      | 459                       |
| cd_rnl_orf197                       | 96.11             | 180                     | 1.91567e-125   | cp_rnl_orf194                          | 197                       |
| cd_rns_orf171                       | 96.45             | 169                     | 9.82424e-119   | cp_rns_orf416                          | 171                       |
| cd_rns_orf249                       | 96.45             | 169                     | 9.82424e-119   | cp_rns_orf416                          | 171                       |
