# Supplementary material for: Intron Derived Size Polymorphism in the Mitochondrial Genomes of Closely Related Chrysoporthe Species
Source: PubMed Central journal article supplement (PMC4894602; doi:10.1371/journal.pone.0156104), 2016-06-06
Supplement: pone.0156104.s009.pdf [file pone.0156104.s009.pdf]

**S5 Table. BLAST analysis of intronic and free standing HEG protein sequences against mt genomes deposited in NCBI GenBank database. HEG type**  
were annotated using the NCBI Conserved Domain Database (CDD).

| Query (intron)     | Top Hit Accession | % identity | Alignment length | E-value      | Description                                                 | Query length | HEG Type  |
|--------------------|-------------------|------------|------------------|--------------|-------------------------------------------------------------|--------------|-----------|
| ca_atp6_i1_orf452  | AKQ53315          | 48.35      | 424              | 1.63845e-115 | <i>Sclerotinia sclerotiorum</i> 1980 UF-70                  | 452          | LAGLIDADG |
| ca_cob_i1_orf361   | 1703265F          | 49.16      | 299              | 5.98996e-90  | <i>Podospora anserina</i> cytochrome oxidase I intronic ORF | 360          | LAGLIDADG |
| ca_cob_i3_orf331   | CAA38805          | 39.07      | 279              | 5.17524e-45  | <i>Podospora anserina</i>                                   | 331          | LAGLIDADG |
| ca_cob_i4_orf344   | EYE89922          | 79.86      | 288              | 8.15619e-155 | <i>Aspergillus ruber</i> CBS 135680                         | 344          | GIY-YIG   |
| ca_cob_i5_orf305   | YP_009126715      | 76.51      | 315              | 5.54442e-167 | <i>Neurospora crassa</i> OR74A                              | 305          | LAGLIDADG |
| ca_cob_i6_orf179   | YP_008964970      | 42.11      | 171              | 1.83817e-36  | <i>Annulohyphoxylon stygium</i>                             | 179          | LAGLIDADG |
| ca_cox1_i1_orf327  | AKQ53312          | 72.70      | 326              | 9.22196e-169 | <i>Sclerotinia sclerotiorum</i> 1980 UF-70                  | 327          | LAGLIDADG |
| ca_cox1_i1_orf361  | YP_004376358      | 48.28      | 319              | 1.90945e-92  | <i>Moniliophthora roreri</i>                                | 361          | LAGLIDADG |
| ca_cox1_i2_orf240  | YP_008082053      | 42.53      | 221              | 5.57199e-45  | <i>Rhizoctonia solani</i>                                   | 240          | LAGLIDADG |
| ca_cox1_i3_orf183  | AFM36681          | 46.93      | 179              | 7.76828e-52  | <i>Ophiostoma hyalothecium</i>                              | 183          | LAGLIDADG |
| ca_cox1_i3_orf132  | XP_007693509      | 77.59      | 116              | 7.26496e-55  | <i>Bipolaris oryzae</i> ATCC 44560                          | 132          | LAGLIDADG |
| ca_cox1_i4_orf369  | CAA25371          | 59.67      | 367              | 9.87938e-142 | <i>Aspergillus nidulans</i>                                 | 369          | LAGLIDADG |
| ca_cox1_i5_orf429  | YP_009160660      | 40.07      | 272              | 1.15006e-46  | <i>Hirsutella minnesotensis</i>                             | 429          | GIY-YIG   |
| ca_cox1_i5_orf173  | YP_008964978      | 75.14      | 173              | 3.71338e-93  | <i>Annulohyphoxylon stygium</i>                             | 173          | LAGLIDADG |
| ca_cox1_i6_orf430  | YP_001249330      | 62.56      | 430              | 1.39084e-179 | <i>Fusarium graminearum</i>                                 | 430          | LAGLIDADG |
| ca_cox1_i7_orf434  | AKQ53319          | 76.94      | 425              | 0            | <i>Sclerotinia sclerotiorum</i> 1980 UF-70                  | 434          | GIY-YIG   |
| ca_cox1_i8_orf279  | YP_008964985      | 80.99      | 263              | 3.95451e-147 | <i>Annulohyphoxylon stygium</i>                             | 279          | LAGLIDADG |
| ca_cox1_i8_orf203  | XP_002839373      | 63.64      | 198              | 6.25949e-75  | <i>Tuber melanosporum</i> Mel28                             | 203          | LAGLIDADG |
| ca_cox1_i9_orf346  | YP_005088117      | 73.78      | 347              | 5.333e-172   | <i>Fusarium solani</i>                                      | 346          | LAGLIDADG |
| ca_cox1_i10_orf269 | AFD95924          | 75.46      | 269              | 1.63384e-146 | <i>Talaromyces stipitatus</i>                               | 269          | GIY-YIG   |

|                    |              |       |     |              |                                                                                              |     |           |
|--------------------|--------------|-------|-----|--------------|----------------------------------------------------------------------------------------------|-----|-----------|
| ca_cox1_i1_orf428  | YP_008964986 | 77.61 | 451 | 0            | <i>Annulohyphoxylon stygium</i>                                                              | 428 | GIY-YIG   |
| ca_IN_orf362       | KIH86252     | 42.00 | 300 | 2.37712e-73  | <i>Sporothrix brasiliensis 5110</i>                                                          | 362 | LAGLIDADG |
| ca_nad2_i2_orf714  | 1703265F     | 48.99 | 296 | 2.56279e-92  | <i>Podospora anserina cytochrome oxidase I intronic ORF</i>                                  | 714 | GIY-YIG   |
| ca_IN_orf402       | 4Z1X_A       | 53.38 | 296 | 2.97005e-100 | <i>Fusarium graminearum PH-1 Chain B, Crystal Structure Of Laglidadg Homing Endonuclease</i> | 402 | LAGLIDADG |
| ca_IN_orf146       | YP_004778114 | 78.57 | 28  | 7.43104e-05  | <i>Sporothrix schenckii</i>                                                                  | 146 | LAGLIDADG |
| ca_IN_orf191       | 5E5S_A       | 48.19 | 193 | 1.45587e-52  | <i>Sordaria macropora</i>                                                                    | 191 | LAGLIDADG |
| ca_cox2_i1_orf325  | YP_008854719 | 59.04 | 293 | 1.0262e-103  | <i>Ganoderma sinense</i>                                                                     | 325 | GIY-YIG   |
| ca_cox2_i2_orf259  | YP_009072388 | 80.69 | 259 | 4.31736e-151 | <i>Sclerotinia borealis</i>                                                                  | 259 | GIY-YIG   |
| ca_cox2_i2_orf100  | YP_009072388 | 87.63 | 97  | 5.45437e-51  | <i>Sclerotinia borealis</i>                                                                  | 100 | LAGLIDADG |
| ca_IN_orf459       | CCO62245     | 29.53 | 359 | 1.3817e-39   | <i>Rhodotorula taiwanensis RSI</i>                                                           | 459 | GIY-YIG   |
| ca_IN_orf369       | YP_001249320 | 52.29 | 218 | 3.7195e-70   | <i>Fusarium graminearum</i>                                                                  | 369 | LAGLIDADG |
| ca_IN_orf185       | AGN49019     | 69.93 | 153 | 3.31461e-66  | <i>Botrytis cinerea B05.10</i>                                                               | 185 | GIY-YIG   |
| ca_IN_orf102       | EMR89155     | 71.56 | 109 | 8.80858e-42  | <i>Botrytis cinerea BcDWI</i>                                                                | 102 | GIY-YIG   |
| ca_nad4L_i1_orf177 | AKQ53295     | 72.90 | 155 | 5.30337e-67  | <i>Sclerotinia sclerotiorum 1980 UF-70</i>                                                   | 177 | LAGLIDADG |
| ca_nad4L_i1_orf329 | YP_009112035 | 48.41 | 314 | 2.70105e-89  | <i>Fusarium gerlachii</i>                                                                    | 329 | LAGLIDADG |
| ca_nad5_i1_orf537  | NP_074944    | 65.56 | 543 | 0            | <i>Podospora anserina</i>                                                                    | 537 | LAGLIDADG |
| ca_nad5_i2_orf99   | YP_008964961 | 77.27 | 44  | 3.25911e-15  | <i>Annulohyphoxylon stygium</i>                                                              | 99  | LAGLIDADG |
| ca_nad5_i2_orf354  | YP_009072328 | 32.99 | 388 | 2.45896e-44  | <i>Sclerotinia borealis</i>                                                                  | 354 | GIY-YIG   |
| ca_nad5_i2_orf141  | AKQ53305     | 50.81 | 124 | 5.9065e-32   | <i>Sclerotinia sclerotiorum 1980 UF-70</i>                                                   | 141 | GIY-YIG   |
| ca_nad5_i13_orf302 | AAW67497     | 69.08 | 304 | 4.68452e-141 | <i>Fusarium oxysporum</i>                                                                    | 302 | LAGLIDADG |
| ca_atp6_i1_orf417  | AKQ53315     | 48.46 | 421 | 3.21309e-116 | <i>Sclerotinia sclerotiorum 1980 UF-70</i>                                                   | 417 | LAGLIDADG |
| ca_atp6_i1_orf452  | AKQ53315     | 48.35 | 424 | 1.63845e-115 | <i>Sclerotinia sclerotiorum 1980 UF-70</i>                                                   | 452 | LAGLIDADG |
| ca_atp6_i2_orf370  | YP_008964995 | 72.85 | 372 | 0            | <i>Annulohyphoxylon stygium</i>                                                              | 370 | GIY-YIG   |

|                   |              |       |     |              |                                                      |     |           |
|-------------------|--------------|-------|-----|--------------|------------------------------------------------------|-----|-----------|
| ca_atp6_i1_orf452 | YP_009158300 | 95.38 | 260 | 4.59532e-164 | <i>Diaporthe longicolla</i>                          | 264 | LAGLIDADG |
| ca_atp6_i1_orf417 | AKQ53315     | 48.46 | 421 | 3.21309e-116 | <i>Sclerotinia sclerotiorum</i> 1980<br><i>UF-70</i> | 417 | LAGLIDADG |
| ca_atp6_i1_orf452 | AKQ53315     | 48.35 | 424 | 1.63845e-115 | <i>Sclerotinia sclerotiorum</i> 1980<br><i>UF-70</i> | 452 | LAGLIDADG |
| ca_atp6_i3_orf409 | XP_003342404 | 65.69 | 376 | 6.10401e-159 | <i>Sordaria macrospora k-hell</i>                    | 409 | GIY-YIG   |
| ca_atp6_i3_orf237 | YP_001427393 | 74.03 | 231 | 3.23166e-113 | <i>Parastagonospora nodorum</i><br><i>SN15</i>       | 237 | GIY-YIG   |
| ca_IN_orf195      | EQD84148     | 54.17 | 24  | 2.90092      | <i>Saccharopolyspora erythraea D</i>                 | 195 | LAGLIDADG |
| ca_rns_orf267     | AAB84209     | 92.51 | 267 | 0            | <i>Cryphonectria parasitica</i>                      | 267 | LAGLIDADG |
| ca_rns_orf512     | AAB84210     | 66.76 | 358 | 3.87038e-164 | <i>Cryphonectria parasitica</i>                      | 512 | LAGLIDADG |
| ca_rns_orf326     | AAB84211     | 68.90 | 328 | 6.15189e-160 | <i>Cryphonectria parasitica</i>                      | 326 | LAGLIDADG |
| ca_rns_orf373     | AAB84212     | 94.37 | 373 | 0            | <i>Cryphonectria parasitica</i>                      | 373 | LAGLIDADG |
| ca_IN_orf297      | YP_008964996 | 55.69 | 255 | 1.22603e-83  | <i>Annulohyphoxylon stygium</i>                      | 297 | GIY-YIG   |
| ca_cox3_i1_orf314 | AGN49000     | 62.88 | 299 | 1.87911e-129 | <i>Botrytis cinerea B05.10</i>                       | 314 | LAGLIDADG |
| ca_cox3_i1_orf335 | YP_005088113 | 39.32 | 295 | 7.7595e-47   | <i>Fusarium solani</i>                               | 335 | LAGLIDADG |
| ca_nad6_i2_orf473 | YP_007507089 | 55.66 | 424 | 4.60049e-150 | <i>Ceratocystis cacaofunesta</i>                     | 473 | LAGLIDADG |
| ca_IN_orf368      | YP_008854715 | 36.08 | 352 | 3.5558e-63   | <i>Ganoderma sinense</i>                             | 368 | LAGLIDADG |
| ca_IN_orf211      | WP_025294344 | 40.00 | 35  | 2.74342      | <i>Sphingomonas sanxanigenens</i>                    | 211 | LAGLIDADG |
| ca_IN_orf153      | XP_009656850 | 25.00 | 84  | 1.69303      | <i>Verticillium dahliae VdLs.17</i>                  | 153 | LAGLIDADG |
| ca_IN_orf248      | YP_007507082 | 34.50 | 200 | 2.63005e-15  | <i>Ceratocystis cacaofunesta</i>                     | 248 | GIY-YIG   |
| ca_rnl_orf318     | AKQ53307     | 49.03 | 206 | 2.96557e-58  | <i>Sclerotinia sclerotiorum</i> 1980<br><i>UF-70</i> | 318 | GIY-YIG   |
| ca_rnl_orf245     | AKM22523     | 59.17 | 240 | 7.94197e-88  | <i>Cordyceps militaris</i>                           | 245 | GIY-YIG   |
| ca_rnl_orf188     | GAO18872     | 55.68 | 176 | 4.33611e-58  | <i>Ustilaginoidea virens</i>                         | 188 | LAGLIDADG |
| ca_rnl_orf246     | AKM22622     | 66.29 | 175 | 4.46394e-75  | <i>Cordyceps militaris</i>                           | 246 | LAGLIDADG |
| ca_rnl_orf455     | NP_074929    | 39.08 | 325 | 3.59422e-62  | <i>Podospora anserina</i>                            | 455 | GIY-YIG   |
| ca_rnl_orf401     | ACL27279     | 44.56 | 294 | 9.50933e-78  | <i>Ustilago maydis</i>                               | 401 | LAGLIDADG |
| ca_rnl_orf459     | YP_007507038 | 42.48 | 412 | 4.55929e-86  | <i>Ceratocystis cacaofunesta</i>                     | 459 | LAGLIDADG |
| ca_rnl_orf540     | AAC24230     | 87.74 | 530 | 0            | <i>Cryphonectria parasitica</i>                      | 540 | LAGLIDADG |

|                       |                      |            |                   |                         |                                                |                    |                     |
|-----------------------|----------------------|------------|-------------------|-------------------------|------------------------------------------------|--------------------|---------------------|
| ca_rnl_orf260         | AAC24230             | 87.60      | 258               | 1.00703e-158            | <i>Cryphonectria parasitica</i>                | 260                | LAGLIDADG           |
| ca_rnl_orf383         | 3R7P_A               | 43.15      | 336               | 1.30797e-71             | <i>Chain A, The Crystal Structure Of I-ltr</i> | 383                | LAGLIDADG           |
| ca_IN_orf348          | YP_009136815         | 40.64      | 342               | 1.58476e-82             | <i>Fusarium culmorum</i>                       | 348                | LAGLIDADG           |
| ca_IN_orf730          | CDL73348             | 38.06      | 402               | 8.2847e-76              | <i>Fusarium pseudograminearum CS5834</i>       | 730                | LAGLIDADG           |
| ca_IN_orf478          | YP_007507047         | 39.65      | 401               | 1.976e-75               | <i>Ceratocystis cacaofunesta</i>               | 478                | LAGLIDADG           |
| ca_nad1_i1_orf473     | NP_074957            | 61.85      | 464               | 0                       | <i>Podospora anserina</i>                      | 473                | GIY-YIG             |
| ca_nad1_i2_orf152     | YP_008964989         | 83.44      | 157               | 4.73107e-88             | <i>Annulohyphoxylon stygium</i>                | 152                | LAGLIDADG           |
| ca_nad4_i1_orf410     | YP_008757687         | 47.50      | 400               | 1.13513e-114            | <i>Fusarium circinatum</i>                     | 410                | LAGLIDADG           |
| <b>Query (Intron)</b> | <b>Top Accession</b> | <b>Hit</b> | <b>% identity</b> | <b>alignment length</b> | <b>E-value</b>                                 | <b>Description</b> | <b>Query length</b> |
| cc_IN_orf203          | EQD84148             | 54.17      | 24                | 3.15127                 | <i>Saccharopolyspora erythraea</i>             | 203                | LAGLIDADG           |
| cc_cob_i1_orf361      | 1703265F             | 49.16      | 299               | 5.98996e-90             | <i>Podospora anserina</i>                      | 360                | LAGLIDADG           |
| cc_cob_i2_orf344      | EYE89922             | 79.86      | 288               | 8.15619e-155            | <i>Aspergillus ruber CBS 135680</i>            | 344                | GIY-YIG             |
| cc_cob_i3_orf305      | YP_009126715         | 76.51      | 315               | 5.54442e-167            | <i>Neurospora crassa OR74A</i>                 | 305                | LAGLIDADG           |
| cc_IN_orf103          | WP_005699113         | 26.42      | 53                | 5.78733                 | <i>Haemophilus parainfluenzae HK2019</i>       | 103                | LAGLIDADG           |
| cc_cox1_i1_orf310     | XP_007693509         | 63.40      | 306               | 8.59778e-128            | <i>Bipolaris oryzae ATCC 44560</i>             | 310                | LAGLIDADG           |
| cc_cox1_i3_orf434     | AKQ53319             | 76.94      | 425               | 0                       | <i>Sclerotinia sclerotiorum 1980 UF-70</i>     | 434                | GIY-YIG             |
| cc_cox1_i2_orf306     | YP_004376350         | 73.29      | 277               | 4.95562e-153            | <i>Moniliophthora roleri</i>                   | 306                | LAGLIDADG           |
| cc_cox1_i4_orf279     | YP_008964985         | 80.99      | 263               | 3.95451e-147            | <i>Annulohyphoxylon stygium</i>                | 279                | LAGLIDADG           |
| cc_cox1_i5_orf269     | AFD95924             | 75.46      | 269               | 1.63384e-146            | <i>Talaromyces stipitatus</i>                  | 269                | GIY-YIG             |
| cc_cox1_i6_orf428     | YP_008964986         | 77.38      | 451               | 0                       | <i>Annulohyphoxylon stygium</i>                | 428                | GIY-YIG             |
| cc_IN_orf316          | KIH86252             | 38.96      | 249               | 2.93745e-52             | <i>Sporothrix brasiliensis 5110</i>            | 316                | LAGLIDADG           |
| cc_IN_orf325          | YP_008854719         | 59.39      | 293               | 1.05103e-104            | <i>Ganoderma sinense</i>                       | 325                | GIY-YIG             |
| cc_nad5_i1_orf302     | AAW67497             | 69.08      | 304               | 4.68452e-141            | <i>Fusarium oxysporum</i>                      | 302                | LAGLIDADG           |
| cc_atp6_i1_orf257     | YP_001427393         | 74.62      | 260               | 1.23618e-131            | <i>Parastagonospora nodorum SN15</i>           | 257                | GIY-YIG             |
| cc_IN_orf203          | YP_009158300         | 95.77      | 260               | 2.80965e-164            | <i>Diaporthe longicolla</i>                    | 264                | LAGLIDADG           |

|                   |              |            |                  |              |                                            |              |           |
|-------------------|--------------|------------|------------------|--------------|--------------------------------------------|--------------|-----------|
| cc_IN_orf203      | EQD84148     | 54.17      | 24               | 3.15127      | <i>Saccharopolyspora erythraea</i>         | 203          | LAGLIDADG |
| cc_IN_orf245      | AKM22523     | 59.58      | 240              | 3.87846e-89  | <i>Cordyceps militaris</i>                 | 245          | GIY-YIG   |
| cc_rnl_orf246     | AKM22622     | 66.29      | 175              | 1.31338e-75  | <i>Cordyceps militaris</i>                 | 246          | LAGLIDADG |
| cc_rnl_orf551     | AAC24230     | 88.15      | 523              | 0            | <i>Cryphonectria parasitica</i>            | 551          | LAGLIDADG |
| Query id          | subject id   | % identity | Alignment length | E-value      | Description                                | Query length |           |
| cd_cob_i1_orf364  | 1703265F     | 49.16      | 299              | 4.53439e-90  | <i>Podospora anserina</i>                  | 363          | LAGLIDADG |
| cd_cob_i2_orf350  | EYE89922     | 69.62      | 339              | 1.29869e-153 | <i>Aspergillus ruber CBS 135680</i>        | 350          | GIY-YIG   |
| cd_cob_i3_orf305  | YP_009126715 | 77.14      | 315              | 2.62494e-168 | <i>Neurospora crassa OR74A</i>             | 305          | LAGLIDADG |
| cd_cob_i4_orf256  | CAB72450     | 69.23      | 221              | 1.02443e-98  | <i>Podospora curvicolla</i>                | 256          | GIY-YIG   |
| cd_cob_i4_orf202  | XP_007693966 | 38.35      | 206              | 3.7913e-30   | <i>Bipolaris oryzae ATCC 44560</i>         | 202          | GIY-YIG   |
| cd_IN_orf199      | CEJ90698     | 29.17      | 72               | 9.63143      | <i>Torrubiella hemipterigena</i>           | 199          | LAGLIDADG |
| cd_IN_orf101      | WP_005699113 | 28.30      | 53               | 1.58061      | <i>Haemophilus</i>                         | 101          | LAGLIDADG |
| cd_cox1_i1_orf310 | XP_007693509 | 63.40      | 306              | 1.14145e-127 | <i>Bipolaris oryzae ATCC 44560</i>         | 310          | LAGLIDADG |
| cd_cox1_i2_orf369 | CAA25371     | 59.67      | 367              | 6.01917e-141 | <i>Aspergillus nidulans</i>                | 369          | LAGLIDADG |
| cd_cox1_i3_orf434 | AKQ53319     | 77.41      | 425              | 0            | <i>Sclerotinia sclerotiorum 1980 UF-70</i> | 434          | GIY-YIG   |
| cd_cox1_i4_orf294 | YP_008964985 | 75.90      | 278              | 1.63718e-141 | <i>Annulohyphoxylon stygium</i>            | 294          | LAGLIDADG |
| cd_cox1_i5_orf269 | AFD95924     | 75.46      | 269              | 1.29904e-146 | <i>Talaromyces stipitatus</i>              | 269          | GIY-YIG   |
| cd_cox1_i6_orf428 | YP_008964986 | 78.05      | 451              | 0            | <i>Annulohyphoxylon stygium</i>            | 428          | GIY-YIG   |
| cd_cox2_i1_orf325 | YP_008854719 | 60.41      | 293              | 3.59504e-106 | <i>Ganoderma sinense</i>                   | 325          | GIY-YIG   |
| Cd_cox2_i2_orf459 | YP_009072388 | 80.44      | 455              | 0            | <i>Sclerotinia borealis</i>                | 459          | GIY-YIG   |
| cd_IN_orf120      | YP_009158299 | 83.67      | 49               | 1.20564e-17  | <i>Diaporthe longicolla</i>                | 52           | LAGLIDADG |
| cd_IN_orf130      | XP_001802056 | 40.00      | 55               | 2.60677      | <i>Parastagonospora nodorum SN15</i>       | 130          | LAGLIDADG |
| cd_IN_orf459      | CCO62245     | 29.53      | 359              | 5.31366e-40  | <i>Rhodotorula taiwanensis RS1</i>         | 459          | GIY-YIG   |
| cd_IN_orf137      | EMR89155     | 62.50      | 40               | 1.74333e-05  | <i>Botrytis cinerea BcDW1</i>              | 137          | LAGLIDADG |
| cd_nad5_i1_orf486 | YP_008964961 | 68.57      | 140              | 3.1618e-56   | <i>Annulohyphoxylon stygium</i>            | 486          | LAGLIDADG |
| cd_IN_orf203      | YP_009158300 | 95.38      | 260              | 9.87819e-164 | <i>Diaporthe longicolla</i>                | 264          | LAGLIDADG |
| cd_rns_orf333     | AAB84211     | 78.16      | 348              | 0            | <i>Cryphonectria parasitica</i>            | 333          | LAGLIDADG |

|                       |                      |                       |                         |                |                                          |                     |           |
|-----------------------|----------------------|-----------------------|-------------------------|----------------|------------------------------------------|---------------------|-----------|
| cd_rns_orf171         | AAB84212             | 96.45                 | 169                     | 1.48402e-112   | <i>Cryphonectria parasitica</i>          | 171                 | LAGLIDADG |
| cd_rns_orf249         | AAB84212             | 96.45                 | 169                     | 1.48402e-112   | <i>Cryphonectria parasitica</i>          | 171                 | LAGLIDADG |
| cd_rns_orf297         | YP_008964996         | 55.69                 | 255                     | 1.22603e-83    | <i>Annulohyphoxylon stygium</i>          | 297                 | GIY-YIG   |
| cd_nad6_i1_orf551     | YP_007507089         | 54.95                 | 424                     | 5.04389e-148   | <i>Ceratocystis cacaofunesta</i>         | 551                 | LAGLIDADG |
| cd_IN_orf383          | YP_009136815         | 39.04                 | 333                     | 1.41708e-63    | <i>Fusarium culmorum</i>                 | 383                 | LAGLIDADG |
| cd_IN_orf219          | XP_011858455         | 29.46                 | 112                     | 9.54856        | <i>Vollenhovia emeryi</i>                | 219                 | LAGLIDADG |
| cd_IN_orf143          | WP_048008014         | 33.96                 | 53                      | 6.40209        | <i>Bacillus firmus</i>                   | 143                 | LAGLIDADG |
| cd_IN_orf106          | YP_009059691         | 40.00                 | 70                      | 0.000197543    | <i>Parasitella parasitica</i>            | 106                 | GIY-YIG   |
| cd_IN_orf179          | AKM22523             | 63.07                 | 176                     | 6.93825e-68    | <i>Cordyceps militaris</i>               | 179                 | GIY-YIG   |
| cd_rnl_orf352         | YP_009072317         | 69.46                 | 239                     | 7.18646e-115   | <i>Sclerotinia borealis</i>              | 352                 | GIY-YIG   |
| cd_rnl_orf197         | GAO18872             | 56.82                 | 176                     | 3.87308e-58    | <i>Ustilaginoidea virens</i>             | 197                 | LAGLIDADG |
| cd_rnl_orf246         | AKM22622             | 65.71                 | 175                     | 2.36427e-74    | <i>Cordyceps militaris</i>               | 246                 | LAGLIDADG |
| cd_rnl_orf459         | YP_007507038         | 41.99                 | 412                     | 2.51508e-85    | <i>Ceratocystis cacaofunesta</i>         | 459                 | LAGLIDADG |
| cd_rnl_orf551         | AAC24230             | 88.34                 | 523                     | 0              | <i>Cryphonectria parasitica</i>          | 551                 | LAGLIDADG |
| cd_rnl_orf486         | YP_007507054         | 38.93                 | 429                     | 5.817e-81      | <i>Ceratocystis cacaofunesta</i>         | 486                 | LAGLIDADG |
| cd_IN_orf333          | 1703265F             | 43.40                 | 318                     | 2.37845e-83    | <i>cytochrome oxidase I intronic ORF</i> | 333                 | LAGLIDADG |
| cd_IN_orf341          | CAA38805             | 42.81                 | 285                     | 5.44616e-65    | <i>Podospora anserina</i>                | 341                 | LAGLIDADG |
| cd_IN_orf126          | CAA38805             | 42.81                 | 285                     | 5.44616e-65    | <i>Podospora anserina</i>                | 126                 | LAGLIDADG |
| cd_nad1_i1_orf191     | YP_008964988         | 74.59                 | 181                     | 1.9351e-86     | <i>Annulohyphoxylon stygium</i>          | 191                 | LAGLIDADG |
| cd_nad1_i2_orf185     | NP_074958            | 59.32                 | 118                     | 1.92786e-32    | <i>Podospora anserina</i>                | 185                 | LAGLIDADG |
| cd_nad1_i2_orf100     | XP_007694002         | 74.16                 | 89                      | 1.20188e-38    | <i>Bipolaris oryzae ATCC 44560</i>       | 100                 | LAGLIDADG |
| cd_nad1_i3_orf122     | YP_009126720         | 75.41                 | 122                     | 8.41989e-55    | <i>Neurospora crassa OR74A</i>           | 122                 | GIY-YIG   |
| cd_nad4_i1_orf432     | KIH86252             | 49.52                 | 420                     | 3.03061e-121   | <i>Sporothrix brasiliensis 5110</i>      | 432                 | LAGLIDADG |
| <b>Query (Intron)</b> | <b>Top Accession</b> | <b>Hit % identity</b> | <b>Alignment length</b> | <b>E-value</b> | <b>Description</b>                       | <b>Query length</b> |           |
| cp_IN_orf460          | AMO66506             | 44.23                 | 104                     | 1.83211e-19    | <i>Pyronema omphalodes</i>               | 460                 | LAGLIDADG |
| cp_cob_i1_orf356      | 1703265F             | 50.17                 | 299                     | 1.86329e-90    | <i>Podospora anserina</i>                | 356                 | LAGLIDADG |
| cp_cob_i2_orf296      | YP_009126715         | 74.43                 | 305                     | 8.7361e-156    | <i>Neurospora crassa OR74A</i>           | 296                 | LAGLIDADG |

|                   |              |       |     |              |                                                  |     |           |
|-------------------|--------------|-------|-----|--------------|--------------------------------------------------|-----|-----------|
| cp_cob_i2_orf122  | YP_009160660 | 45.24 | 42  | 0.000312056  | <i>Hirsutella minnesotensis</i>                  | 122 | LAGLIDADG |
| cp_cob_i3_orf120  | CAB72450     | 72.37 | 76  | 1.63084e-28  | <i>Podospora curvicolla</i>                      | 120 | GIY-YIG   |
| cp_cob_i3_orf201  | XP_007693966 | 38.35 | 206 | 8.57381e-29  | <i>Bipolaris oryzae ATCC 44560</i>               | 201 | LAGLIDADG |
| cp_cox1_i1_orf824 | YP_009029663 | 44.44 | 819 | 0            | <i>Magnusiomyces ingens</i>                      | 824 | LAGLIDADG |
| cp_cox1_i2_orf446 | AMO66533     | 44.67 | 394 | 2.18838e-92  | <i>Pyronema omphalodes</i>                       | 446 | LAGLIDADG |
| cp_cox1_i3_orf782 | NP_043734    | 48.50 | 765 | 0            | <i>Allomyces macrogynus</i>                      | 782 | LAGLIDADG |
| cp_cox1_i4_orf393 | AKQ53316     | 73.31 | 326 | 3.5926e-172  | <i>Sclerotinia sclerotiorum 1980 UF-70</i>       | 393 | GIY-YIG   |
| cp_cox1_i5_orf434 | YP_009072338 | 39.78 | 279 | 1.33149e-48  | <i>Sclerotinia borealis</i>                      | 434 | GIY-YIG   |
| cp_cox1_i5_orf173 | YP_008964978 | 76.61 | 171 | 8.62356e-95  | <i>Annulohyphoxylon stygium</i>                  | 173 | LAGLIDADG |
| cp_cox1_i6_orf436 | AKQ53319     | 76.06 | 426 | 0            | <i>Sclerotinia sclerotiorum 1980 UF-70</i>       | 436 | GIY-YIG   |
| cp_cox1_i7_orf310 | XP_002839373 | 62.79 | 258 | 1.61779e-96  | <i>Tuber melanosporum Mel28</i>                  | 310 | LAGLIDADG |
| cp_cox1_i8_orf108 | XP_014550036 | 62.26 | 106 | 9.62981e-32  | <i>Bipolaris victoriae FI3</i>                   | 108 | GIY-YIG   |
| cp_IN_orf113      | KUI52547     | 72.38 | 105 | 8.06574e-46  | <i>Valsa mali var. pyri</i>                      | 113 | LAGLIDADG |
| cp_IN_orf160      | KUI52547     | 82.50 | 160 | 2.69467e-91  | <i>Valsa mali var. pyri</i>                      | 160 | LAGLIDADG |
| cp_nad2_i1_orf473 | AGN49028     | 70.98 | 386 | 0            | <i>Botrytis cinerea B05.10</i>                   | 473 | LAGLIDADG |
| cp_nad2_i2_orf437 | CCC14769     | 76.11 | 406 | 0            | <i>Sordaria macrospora k-hell</i>                | 437 | LAGLIDADG |
| cp_nad2_i3_orf335 | XP_007335807 | 66.98 | 212 | 2.34515e-95  | <i>Agaricus bisporus var. burnettii JB137-S8</i> | 335 | LAGLIDADG |
| cp_nad2_i4_orf788 | NP_043734    | 44.46 | 767 | 0            | <i>Allomyces macrogynus</i>                      | 788 | LAGLIDADG |
| cp_nad2_i5_orf433 | CDL73098     | 64.76 | 437 | 0            | <i>Fusarium pseudograminearum CS3427</i>         | 433 | LAGLIDADG |
| cp_IN_orf414      | YP_008757687 | 48.22 | 309 | 1.86954e-90  | <i>Fusarium circinatum</i>                       | 414 | LAGLIDADG |
| cp_cox2_i1_orf326 | YP_008854719 | 61.43 | 293 | 4.95172e-107 | <i>Ganoderma sinense</i>                         | 326 | GIY-YIG   |
| cp_cox2_i3_orf112 | YP_009072388 | 86.00 | 100 | 2.36543e-49  | <i>Sclerotinia borealis</i>                      | 112 | LAGLIDADG |
| cp_cox2_i3_orf282 | CDL73554     | 34.62 | 286 | 3.2833e-48   | <i>Fusarium culmorum CS7071</i>                  | 282 | LAGLIDADG |
| cp_cox2_i4_orf332 | CDL73109     | 79.23 | 337 | 0            | <i>Fusarium pseudograminearum CS3427</i>         | 332 | GIY-YIG   |
| cp_IN_orf259      | XP_001802056 | 37.33 | 75  | 0.0948753    | <i>Parastagonospora nodorum SN15</i>             | 259 | LAGLIDADG |

|                   |              |        |     |              |                                                  |     |           |
|-------------------|--------------|--------|-----|--------------|--------------------------------------------------|-----|-----------|
| cp_IN_orf414      | AMO66509     | 52.11  | 213 | 4.11136e-62  | <i>Pyronema omphalodes</i>                       | 414 | LAGLIDADG |
| cp_IN_orf179      | AGN49019     | 59.84  | 127 | 3.77332e-40  | <i>Botrytis cinerea B05.10</i>                   | 179 | GI-YIG    |
| cp_nad5_i1_orf540 | NP_074944    | 64.76  | 542 | 0            | <i>Podospora anserina</i>                        | 540 | LAGLIDADG |
| cp_nad5_i2orf168  | AAO14105     | 100.00 | 168 | 5.23273e-115 | <i>Cryphonectria parasitica</i>                  | 168 | LAGLIDADG |
| cp_nad5_i2_orf290 | AAO14110     | 99.63  | 271 | 0            | <i>Cryphonectria parasitica</i>                  | 290 | LAGLIDADG |
| cp_atp6_i1_orf812 | AAF27656     | 100.00 | 764 | 0            | <i>Cryphonectria parasitica</i>                  | 812 | LAGLIDADG |
| cp_atp6_i2_orf365 | YP_008964995 | 72.07  | 376 | 0            | <i>Annulohyphoxylon stygium</i>                  | 365 | GIY-YIG   |
| cp_atp6_i3_orf238 | YP_001427393 | 71.86  | 231 | 2.81518e-109 | <i>Parastagonospora nodorum SN15</i>             | 238 | GIY-YIG   |
| cp_atp6_i3_orf409 | XP_003342404 | 63.30  | 376 | 2.06184e-152 | <i>Sordaria macrospora k-hell</i>                | 409 | GIY-YIG   |
| cp_IN_orf232      | KPP69029     | 32.84  | 67  | 7.24451      | <i>Scleropages formosus</i>                      | 232 | LAGLIDADG |
| cp_rns_orf285     | AAB84209     | 100.00 | 285 | 0            | <i>Cryphonectria parasitica</i>                  | 285 | LAGLIDADG |
| cp_rns_orf509     | AAB84210     | 98.55  | 415 | 0            | <i>Cryphonectria parasitica</i>                  | 509 | LAGLIDADG |
| cp_rns_orf151     | AAB84211     | 96.40  | 139 | 1.18862e-88  | <i>Cryphonectria parasitica</i>                  | 151 | LAGLIDADG |
| cp_rns_orf416     | AAB84212     | 100.00 | 416 | 0            | <i>Cryphonectria parasitica</i>                  | 416 | LAGLIDADG |
| cp_IN_orf106      | YP_008964996 | 50.51  | 99  | 5.86349e-18  | <i>Annulohyphoxylon stygium</i>                  | 106 | LAGLIDADG |
| cp_cox3_i2_orf318 | AGN49000     | 63.91  | 302 | 2.57071e-129 | <i>Botrytis cinerea B05.10</i>                   | 318 | LAGLIDADG |
| cp_cox3_i4_orf439 | YP_009136869 | 65.44  | 408 | 2.99994e-178 | <i>Fusarium culmorum</i>                         | 439 | LAGLIDADG |
| cp_IN_orf427      | YP_009136815 | 40.48  | 331 | 3.80221e-64  | <i>Fusarium culmorum</i>                         | 427 | LAGLIDADG |
| cp_IN_orf359      | YP_009072328 | 44.31  | 255 | 2.9427e-47   | <i>Sclerotinia borealis</i>                      | 359 | GIY-YIG   |
| cp_IN_orf282      | XP_007335271 | 44.29  | 280 | 2.77259e-68  | <i>Agaricus bisporus var. burnettii JB137-S8</i> | 282 | LAGLIDADG |
| cp_IN_orf247      | YP_009072317 | 71.07  | 242 | 4.28782e-121 | <i>Sclerotinia borealis</i>                      | 247 | GIY-YIG   |
| cp_rnl_orf320     | CAB72450     | 45.19  | 239 | 2.21001e-44  | <i>Podospora curvicolla</i>                      | 320 | GIY-YIG   |
| cp_rnl_orf387     | CCQ18563     | 43.11  | 283 | 5.47906e-67  | <i>Ganoderma lucidum</i>                         | 387 | LAGLIDADG |
| cp_rnl_orf459     | NP_074929    | 39.64  | 333 | 9.5764e-67   | <i>Podospora anserina</i>                        | 459 | GIY-YIG   |
| cp_rnl_orf246     | AKM22622     | 66.29  | 175 | 7.87127e-77  | <i>Cordyceps militaris</i>                       | 246 | LAGLIDADG |
| cp_rnl_orf194     | GAO18872     | 55.37  | 177 | 2.87646e-54  | <i>Ustilaginoidea virens</i>                     | 194 | LAGLIDADG |
| cp_rnl_orf851     | AAC24230     | 100.00 | 851 | 0            | <i>Cryphonectria parasitica</i>                  | 851 | LAGLIDADG |



|                   |              |       |     |              |                                   |     |           |
|-------------------|--------------|-------|-----|--------------|-----------------------------------|-----|-----------|
| cp_rnl_orf268     | YP_008964948 | 62.74 | 263 | 2.13196e-104 | <i>Annulohypoxyton stygium</i>    | 268 | LAGLIDADG |
| cp_nad1_i1_orf211 | CCC14770     | 35.96 | 203 | 5.23672e-29  | <i>Sordaria macrospora k-hell</i> | 211 | LAGLIDADG |
| cp_nad1_i1_orf131 | YP_008964988 | 53.33 | 135 | 9.04755e-38  | <i>Annulohypoxyton stygium</i>    | 131 | LAGLIDADG |
